1 Interferon signaling in the nasal epithelium distinguishes among lethal and common cold  
2 respiratory viruses and is critical for viral clearance

3

4 Clayton J. Otter<sup>1,2</sup>, David M. Renner<sup>1,2</sup>, Alejandra Fausto<sup>1,2</sup>, Li Hui Tan<sup>4</sup>, Noam A. Cohen<sup>3,4,5</sup>,  
5 Susan R. Weiss<sup>1,2</sup>

6

7 1. Department of Microbiology, Perelman School of Medicine, University of Pennsylvania,  
8 Philadelphia, PA, USA.

9 2. Penn Center for Research on Coronaviruses and Other Emerging Pathogens, Perelman  
10 School of Medicine, University of Pennsylvania, Philadelphia, PA, USA.

11 3. Department of Otorhinolaryngology-Head and Neck Surgery, Division of Rhinology,  
12 University of Pennsylvania, Perelman School of Medicine, Philadelphia, PA, USA.

13 4. Corporal Michael J. Crescenz VA Medical Center, Philadelphia, PA, USA.

14 5. Monell Chemical Senses Center, Philadelphia, PA, USA.

15

16 Address all correspondence to: Susan R. Weiss, [weissr@pennmedicine.upenn.edu](mailto:weissr@pennmedicine.upenn.edu)

17

18 **SUMMARY**

19 All respiratory viruses establish primary infections in the nasal epithelium, where efficient innate  
20 immune induction may prevent dissemination to the lower airway and thus minimize  
21 pathogenesis. Human coronaviruses (HCoVs) cause a range of pathologies, but the host and  
22 viral determinants of disease during common cold versus lethal HCoV infections are poorly  
23 understood. We model the initial site of infection using primary nasal epithelial cells cultured at  
24 air-liquid interface (ALI). HCoV-229E, HCoV-NL63 and human rhinovirus-16 are common cold-  
25 associated viruses that exhibit unique features in this model: early induction of antiviral interferon  
26 (IFN) signaling, IFN-mediated viral clearance, and preferential replication at nasal airway  
27 temperature (33°C) which confers muted host IFN responses. In contrast, lethal SARS-CoV-2 and  
28 MERS-CoV encode antagonist proteins that prevent IFN-mediated clearance in nasal cultures.  
29 Our study identifies features shared among common cold-associated viruses, highlighting nasal  
30 innate immune responses as predictive of infection outcomes and nasally-directed IFNs as  
31 potential therapeutics.

32

33 **Keywords:** interferon signaling; nasal epithelium; coronavirus; common cold; virus, temperature

34

## 35 INTRODUCTION

36 A major function of the nasal cavity is to induce turbulent airflow of inspired air which mediates  
37 deposition and entrapment of debris and infectious particles in mucus before reaching the lung.  
38 As a result, all respiratory viruses establish primary infections in the nasal epithelium, which thus  
39 serves as a front-line, dynamic defensive barrier with its apical tight junctions and mucociliary  
40 clearance function. Virus transmission models suggest that aerosolized viral particles, the  
41 mechanism through which most respiratory viruses spread, achieve maximal deposition density  
42 in the nasal cavity where viruses initially replicate<sup>1,2</sup>. This is followed by spread to the lower airway,  
43 often mediated by aspiration along a nasal/oral-lung aspiration axis, where subsequent lung  
44 pathology may occur<sup>3,4</sup>. Alternatively, mucociliary function as well as efficient induction of antiviral  
45 innate immune responses in the nasal epithelium may result in local control of viral replication,  
46 limited spread to the lower airway and minimal pathogenesis.

47

48 The interferon (IFN) signaling pathway is induced at epithelial surfaces following viral recognition  
49 resulting in establishment of an antiviral state that restricts viral spread. Respiratory viruses  
50 produce double-stranded (ds)RNA as a byproduct of their replication, which is recognized by host  
51 sensors such as melanoma differentiation-associated gene 5 (MDA5) and retinoic acid-inducible  
52 gene I (RIG-I)<sup>5-7</sup>. These sensors signal via mitochondrial antiviral signaling protein (MAVS) to  
53 induce phosphorylation of IFN regulatory factors 3 and 7 (IRF3/7). Activated IRF3/7 translocate  
54 into the nucleus where they mediate transcription of type I (IFN- $\alpha$ , IFN- $\beta$ ) and type III (IFN- $\lambda$ ) IFN  
55 genes. IFNs are released from infected cells and signal in both autocrine and paracrine fashions  
56 via their receptors to induce Janus kinase (JAK) / signal transducer and activator of transcription  
57 (STAT) signaling<sup>6,8</sup>. Activated p-STAT proteins translocate into the nucleus where they induce the  
58 transcription of hundreds of IFN-stimulated genes (ISGs) with diverse antiviral effector functions  
59 which target multiple steps in the viral replication cycle<sup>9-11</sup>. Additional antiviral innate immune  
60 pathways important for restriction of viral replication are also induced secondary to dsRNA

61 recognition, including the protein kinase R (PKR) pathway, which results in shutdown of host  
62 translation, and the oligoadenylate synthetase (OAS) / ribonuclease L (RNase L) system, which  
63 results in cleavage of host and viral RNAs<sup>5</sup>. All three of these dsRNA-induced pathways converge  
64 via induction of downstream inflammatory and cell death pathways<sup>12,13</sup>.

65

66 Growing literature associates coordinated, early IFN signaling in the nasal epithelium with  
67 improved disease outcomes. Indeed, in an influenza infection model designed to replicate natural  
68 infection progression from the upper to lower airway, mice lacking functional type III IFN  
69 responses were unable to control viral replication in the upper airway and experienced more  
70 severe disease<sup>14,15</sup>. Severe acute respiratory syndrome coronavirus 2 (SARS-CoV-2), the  
71 causative agent of coronavirus disease 2019 (COVID-19), causes a spectrum of respiratory  
72 disease ranging from asymptomatic infections to lethal pneumonia. Sequencing studies of  
73 nasopharyngeal swabs acquired from COVID-19 patients have correlated early IFN response  
74 signatures in patients' noses with reduced disease severity, whereas patients with muted ISG  
75 profiles tended to have worse outcomes<sup>16-18</sup>. Consistent with antiviral IFN responses in the nose  
76 as determinants of disease outcome, nasally delivered IFN has shown promise as an antiviral  
77 strategy in various animal models of SARS-CoV-2<sup>19,20</sup>.

78

79 It is thus plausible that viruses associated with common cold phenotypes (characterized by self-  
80 limited, upper respiratory symptoms such as runny nose, sore throat, nasal congestion, and facial  
81 pressure) may replicate predominantly in the upper respiratory tract due to IFN-mediated  
82 restriction of spread to the lower airway. Human rhinoviruses (HRVs) are the most common cause  
83 of the common cold, associated with 30-50% of annual cases<sup>21</sup>. HRVs replicate robustly and  
84 induce IFN in nasal cell infection models. Common cold-associated human coronaviruses (HCoV-  
85 229E, -NL63, -OC43, and -HKU1) contribute an additional 15-30% of common cold cases<sup>22</sup>,  
86 however, little is known in terms of these viruses' replication and innate immune induction<sup>23-25</sup>. In

87 contrast to these common cold-associated viruses, the lethal Middle East respiratory syndrome  
88 (MERS)-CoV has been primarily associated with lower respiratory tract replication and lethal  
89 pneumonia in humans, with a case-fatality rate of 36%<sup>26,27</sup>. Indeed, MERS-CoV employs various  
90 strategies to shut down host IFN signaling, including the expression of multiple accessory and  
91 nonstructural proteins that directly antagonize host IFN responses<sup>28,29</sup>. SARS-CoV-2 may  
92 illustrate an intermediate lethal CoV phenotype, as growing literature has characterized innate  
93 immune evasion strategies by SARS-CoV-2 nonstructural and accessory proteins<sup>30-33</sup>. However,  
94 the mechanisms behind the observed variability in COVID-19 among individuals remain to be fully  
95 characterized. This may be partially determined by IFN responsiveness in the upper airway but is  
96 also related to other host factors such as prior exposure and vaccination status. Influenza viruses  
97 are yet another class of respiratory viruses that circulate seasonally and cause significant burden  
98 on human health (infecting 5-10% of adults each year). Influenza viruses are associated with  
99 replication throughout the respiratory tract despite robust IFN induction in most epithelial cell  
100 models, and cause typically more severe “flu-like” symptoms which include fever and myalgias<sup>34-</sup>  
101 <sup>37</sup>. Clearly, respiratory viruses differentially interface with host antiviral signaling, and early antiviral  
102 innate immune responses in the nasal epithelium may contribute to these variable clinical disease  
103 phenotypes during infection.

104

105 In addition to innate immune induction, another factor which may be involved in restricting viral  
106 replication to the upper airways is temperature. A gradient of increasing temperature is present in  
107 the respiratory tract, ranging from 25°C with inspired air at the nares, to 30-35°C as inhaled air is  
108 warmed in the nasal cavity and nasopharynx, and finally reaching 37°C or ambient body  
109 temperature in the lungs<sup>38,39</sup>. In comparing the replication of common cold-associated HCoVs with  
110 lethal SARS-CoV-2 and MERS-CoV in primary nasal epithelial cells, we previously reported that  
111 HCoV-229E and HCoV-NL63 replicate more efficiently at 33°C (nasal temperature) than 37°C  
112 (lung temperature), while SARS-CoV-2 has an intermediate phenotype, replicating optimally at

113 33°C only at late time points<sup>40</sup>. MERS-CoV had no temperature preference. This is consistent with  
114 HRV studies which have characterized nasal airway temperature as more permissive to  
115 replication by the prototypical common cold virus<sup>41,42</sup>. Elevated temperatures have also been  
116 suggested to restrict SARS-CoV-2, but not SARS-CoV, in a lower airway infection model<sup>43</sup>.

117

118 We utilize a primary cell culture system in which patient-derived nasal epithelial cells are  
119 differentiated at an air-liquid interface (ALI) to model infection of the nasal epithelium where  
120 respiratory viruses initially replicate. After differentiation, nasal ALI cultures recapitulate various  
121 features of the *in vivo* nasal epithelium, including its heterogeneous cellular population and  
122 mucociliary clearance function. We infect nasal ALI cultures with a panel of respiratory viruses  
123 associated with a spectrum of clinical disease outcomes in humans, including lethal and common  
124 cold-associated coronaviruses, human rhinovirus-16 (HRV-16), and a seasonal influenza A  
125 isolate, to identify features shared among common cold-associated viruses in this nasal cell  
126 model. We compare the temperature-dependent replication kinetics and IFN response patterns  
127 of diverse respiratory viruses, as well as the role of IFN signaling and/or viral antagonism of these  
128 responses in the control of replication. Our data indicate that temperature-dependent, IFN-  
129 mediated restriction of viral replication may be a universal feature of common cold-associated  
130 viruses, further emphasizing the role of early innate immunity as a key determinant of disease  
131 severity.

132

## 133 RESULTS

### 134 Replication of common cold-associated viruses is restricted late during infection of 135 primary nasal epithelial cell cultures

136 After differentiation, pooled-donor nasal ALI cultures were equilibrated at 33°C (nasal airway  
137 temperature) and infected at the apical surface with a panel of respiratory viruses: two lethal  
138 HCoVs (SARS-CoV-2 and MERS-CoV), two common cold-associated HCoVs (HCoV-229E,  
139 HCoV-NL63), human rhinovirus-16 (HRV-16), and a seasonal H1N1 influenza A isolate  
140 (IAV/Brisbane/2007, henceforth referred to as IAV). Apical surface liquid (ASL) was collected at  
141 48-hour intervals until 192 hours post infection (hpi) and titrated via plaque assay to characterize  
142 viral replication kinetics in nasal cultures. Average shed viral titers for each virus are shown in  
143 **Figure 1**. The viral growth curves segregated into two distinct kinetic patterns. Common-cold  
144 associated viruses (HCoV-229E, HCoV-NL63, and HRV-16) reached maximal viral titers early  
145 (~48 hpi) followed by rapid reductions in viral titer to nearly the limit of detection ( $2 \log_{10}$  pfu/mL)  
146 by 144 hpi (**Figure 1A**). We thus define viral clearance by nasal epithelial cells as a reduction in  
147 viral titer to nearly the limit of detection. In contrast, SARS-CoV-2, MERS-CoV, and IAV did not  
148 exhibit this reduction in viral titers (**Figure 1B**). After reaching peak titers (at 48 hpi for MERS-  
149 CoV and IAV, and at 144 hpi for SARS-CoV-2), viral titers plateaued with continued apical release  
150 of infectious virus. These data suggest that common cold-associated viruses are efficiently  
151 cleared by nasal epithelial cells, whereas lethal HCoVs as well as IAV are not. Additionally, the  
152 viruses differed in magnitude of replication, with SARS-CoV-2, HCoV-229E, and HRV-16 all  
153 replicating to peak titers of  $\sim 6 \log_{10}$  pfu/mL, though SARS-CoV-2 had delayed replication kinetics.  
154 HCoV-NL63, MERS-CoV, and IAV reached peak titers 100-fold lower (approximately  $4 \log_{10}$   
155 pfu/mL).

156

157 **Robust IFN signaling responses are induced following infection with common cold-  
158 associated viruses as well as IAV**

159 We and others have investigated immune antagonism by lethal HCoVs, particularly by MERS-  
160 CoV which adeptly shuts down IFN signaling and other innate immune responses induced  
161 following recognition of dsRNA<sup>28,29,44</sup>. In contrast, SARS-CoV-2 activates dsRNA-induced innate  
162 immune responses such as IFN signaling and the protein kinase R (PKR) pathway in respiratory  
163 epithelial cell lines. However, induction of IFN responses during SARS-CoV-2 infection of primary  
164 nasal cells is delayed relative to IAV<sup>37,44</sup>. Thus, we hypothesized that the lack of viral clearance  
165 during SARS-CoV-2 and MERS-CoV infection of nasal ALI cultures may be related to impaired  
166 innate immune responses relative to those induced following common cold-associated viruses.

167  
168 We performed bulk RNA sequencing to identify differentially regulated genes (relative to mock-  
169 infected cultures) following nasal cell infection by each respiratory virus characterized. Genes with  
170 significant up- or down-regulation were assessed using DESeq2 followed by Gene Set  
171 Enrichment Analysis (GSEA)<sup>45,46</sup>. This analysis identified immune response genes and specifically  
172 the antiviral IFN response as the most significantly upregulated pathway following infection by  
173 each of the respiratory viruses except for MERS-CoV (consistent with its efficient shutdown of  
174 antiviral responses). Volcano plots highlighting fold changes in normalized transcript abundances  
175 relative to mock-infected cultures are shown in **Figure 2A**, with IFN response genes annotated  
176 from the Molecular Signatures Database (MSigDB)  
177 HALLMARK\_INTERFERON\_ALPHA\_RESPONSE gene list highlighted in green<sup>47</sup>. This analysis  
178 confirmed the lack ISG induction by MERS-CoV infection. Additionally, it revealed that relatively  
179 few ISGs were induced following SARS-CoV-2 infection compared to the common cold-  
180 associated viruses, although more than during MERS-CoV infection. The total number of genes  
181 related to the IFN response that reached significance thresholds for each virus is shown in **Figure**  
182 **2B**. Infection with the common cold-associated HCoVs as well as HRV-16 and IAV induced a  
183 larger number of ISGs with greater log<sub>2</sub> fold change values above mock levels compared to either  
184 MERS-CoV or SARS-CoV-2 infection. Though IAV was not cleared by nasal cells, it was



185 associated with robust IFN and ISG induction (in a similar pattern to the common cold-associated  
186 viruses), suggesting IAV may exhibit a unique phenotype in this nasal cell model. Stat values  
187 (which integrate the magnitude of expression change as well as statistical significance) calculated  
188 in DESeq2 for genes in the MSigDB list were combined from each infection and visualized as a  
189 heatmap using Morpheus. We performed hierarchical clustering of IFN-related genes to generate  
190 a heatmap shown in **Figure 2C**, ranking stat values of each ISG from least (colored blue) to most  
191 robustly (colored red) changed during infection with each respiratory virus. Approximately half of  
192 the genes involved in IFN signaling were most robustly induced by IAV (with similar induction by  
193 HRV-16 for a subset of these). An additional large category of IFN-related genes was strongly  
194 induced by all three common cold-associated viruses as well as IAV. In comparison, SARS-CoV-  
195 2 and MERS-CoV infected cells demonstrated expression patterns most similar to those of mock-  
196 infected cultures.

197

198 These RNA-seq patterns were complemented via RT-qPCR quantifying mRNA abundance of type  
199 I and III IFN as well as five representative ISGs (**Supplement S1**). To complement the comparison  
200 of ISG expression at the RNA level, protein lysates from nasal cells infected with each virus as  
201 well as mock-infected cultures were analyzed via western blot to compare levels of STAT1  
202 phosphorylation as well as ISG protein abundances (interferon-induced protein with  
203 tetratricopeptide repeats 1, IFIT1, Viperin, MDA5, PKR) among the viruses (**Figure 2D**). For this  
204 analysis, early (96 hpi) and late (192 hpi) protein lysates for SARS-CoV-2 were included, given  
205 reports of delayed IFN induction by SARS-CoV-2 (RNA-seq analysis for SARS-CoV-2 was at 96  
206 hpi)<sup>37</sup>. Western blots further validate the RNA-seq analysis, highlighting no detectable increase in  
207 STAT phosphorylation or ISG protein levels above mock levels following MERS-CoV infection or  
208 early during SARS-CoV-2 infection. However, IFN responses do occur late during SARS-CoV-2  
209 infection (192 hpi). Both common cold-associated HCoVs (-229E and -NL63) as well as HRV-16  
210 and IAV resulted in robust STAT phosphorylation as well as robust increases in ISG protein

211 abundances much earlier (48 hpi). We also evaluated activation of another dsRNA-induced  
212 antiviral pathway, the PKR pathway and found that patterns of PKR phosphorylation mirrored the  
213 gradient of ISG induction. Confirmation of infection via immunoblotting for capsid proteins of each  
214 virus is shown in **Supplement S2**. Taken together, common cold-associated viruses, as well as  
215 IAV, induce robust IFN signaling responses early during infection of primary nasal cells, whereas  
216 MERS-CoV results in no detectable IFN induction and SARS-CoV-2 is associated with delayed  
217 IFN responses.

218

### 219 **Inhibition of IFN signaling prevents clearance of common cold-associated viruses,** 220 **resulting in prolonged viral burden which impacts epithelial barrier integrity**

221 To determine how IFN induction impacts viral replication, we treated nasal cell cultures with  
222 ruxolitinib (RUX), a small molecular JAK1/2 inhibitor, which inhibits IFN signaling and induction of  
223 ISGs<sup>48</sup>. In vehicle control (DMSO)-treated nasal cells (shown in gray for each virus), common  
224 cold-associated viruses (HCoV-229E and -NL63 as well as HRV-16) were efficiently cleared at  
225 late time points (**Figure 3A**). However, during infection in the presence of RUX (maroon curves),  
226 replication was prolonged and viral clearance did not occur, suggesting that viral clearance is IFN-  
227 mediated. In contrast, RUX treatment had only a minor impact on replication of MERS-CoV,  
228 consistent with minimal induction of IFN signaling responses by MERS-CoV. SARS-CoV-2 titers  
229 were reproducibly increased ~ten-fold in the presence of RUX only late in infection, consistent  
230 with delayed ISG responses by SARS-CoV-2 (**Figure 2D**). Although IAV was associated with  
231 robust induction of IFN signaling, RUX treatment had an intermediate effect on viral replication  
232 with slightly increased viral titers at late time points (144, 192 hpi).

233

234 Since RUX treatment results in inefficient clearance of common cold-associated viruses (and to  
235 some extent IAV), we sought to investigate how this prolonged viral burden impacted epithelial  
236 barrier integrity. We previously demonstrated defects in epithelial barrier function as measured by

237 loss of trans-epithelial electrical resistance (TEER) early during HCoV-229E infection in nasal  
238 cultures, with recovery of epithelial barrier integrity at late time points, whereas HCoV-NL63  
239 caused TEER defects only at late time points. HRV-16 and IAV have also been associated with  
240 impaired epithelial barrier function in nasal cell models<sup>49-51</sup>. Thus, we evaluated TEER at 48-hour  
241 intervals in the presence of RUX for HCoV-229E, HRV-16, and IAV-infected nasal cells (**Figure**  
242 **3B**). For each of these viruses, all infected cultures (vehicle control- or RUX-treated) exhibited  
243 early loss of TEER, indicating barrier disruption. While untreated cultures recovered to pre-  
244 infection (or higher in the case of IAV) TEER levels, RUX treatment blocked TEER recovery to  
245 healthy levels. Thus, prolonged viral burden in the context of impaired antiviral IFN responses  
246 (modeled with RUX treatment) has a detrimental impact on the recovery of epithelial barrier  
247 integrity.

248

### 249 **Inactivation of IFN antagonists encoded by MERS-CoV and SARS-CoV-2 renders lethal** 250 **HCoVs to exhibit features of common cold-associated viruses**

251 Since the lethal HCoVs either completely shut down (in the case of MERS-CoV) or significantly  
252 delay (in the case of SARS-CoV-2) IFN signaling responses, we hypothesized that inactivation of  
253 the IFN antagonists encoded by these viruses would result in IFN-mediated clearance in nasal  
254 cell cultures. Both viruses express the conserved CoV nonstructural protein 15 (nsp15), which  
255 contains an endoribonuclease activity (EndoU) which limits IFN responses<sup>29,52-54</sup>. MERS-CoV  
256 additionally encodes accessory protein NS4a which binds and sequesters dsRNA from  
257 recognition from host sensors<sup>55,56</sup>. We have previously reported that mutants of each virus  
258 expressing an inactivated EndoU (nsp15<sup>mut</sup>) or a MERS-CoV double mutant additionally lacking  
259 expression of NS4a (MERS-CoV-nsp15<sup>mut</sup>/ΔNS4a) induce increased IFN signaling  
260 responses<sup>28,29,57</sup>. Western blot analysis of protein lysates from nasal cultures infected with either  
261 MERS-CoV-nsp15<sup>mut</sup>/ΔNS4a or SARS-CoV-2-nsp15<sup>mut</sup> revealed increased IFN signaling  
262 responses compared to their respective wild-type (WT) parental viruses, indicated by increased

263 STAT1 phosphorylation as well as increased abundance of representative ISGs IFIT1, viperin,  
264 MDA5, and PKR (**Figure 4A, 4B**). The MERS-CoV double mutant resulted in robust induction of  
265 the IFN pathway at earlier time points (48 and 96 hpi), whereas the SARS-CoV-2 mutant virus  
266 showed IFN signatures most clearly at 192 hpi, consistent with our prior studies<sup>40,57</sup>. After  
267 confirming that inactivation of IFN antagonists encoded by the lethal HCoVs resulted in robust  
268 IFN induction in nasal cell cultures, we conducted growth curves to determine how increased IFN  
269 signaling impacted viral replication. MERS-CoV-nsp15<sup>mut</sup>/ΔNS4a was attenuated for replication  
270 compared to WT MERS-CoV beginning at 48 hpi. However, while WT MERS-CoV continued to  
271 replicate at late times post infection, MERS-CoV-nsp15<sup>mut</sup>/ΔNS4a titers declined to nearly the limit  
272 of detection by 144 and 192 hpi (**Figure 4C**). For the SARS-CoV-2 nsp15 mutant, growth curves  
273 were extended to 240 hpi given the delay in IFN induction by SARS-CoV-2 that was still apparent  
274 during infection with the mutant virus. SARS-CoV-2 nsp15<sup>mut</sup> was attenuated relative to WT  
275 SARS-CoV-2 only at late time points (beginning at 144 hpi) and similarly exhibited a trend toward  
276 clearance by nasal cells at 192 and 240 hpi, while WT SARS-CoV-2 titers did not decline (**Figure**  
277 **4D**). To confirm that the decline in viral titers for these MERS-CoV and SARS-CoV-2 mutant  
278 viruses was IFN-mediated, nasal cells were pre-treated with RUX, resulting in near-complete  
279 rescue of viral replication to WT levels for both mutant viruses as we have recently reported for  
280 SARS-CoV-2 (**Figure 4C, 4D**)<sup>57</sup>. Thus, inactivation of IFN antagonists encoded by SARS-CoV-2  
281 and MERS-CoV results in a phenotype mirroring common cold-associated viruses, whereby  
282 mutant viruses undergo IFN-mediated clearance in nasal cultures.

283

#### 284 **Respiratory viruses are differentially sensitive to IFN pre-treatment**

285 Given the association between robust IFN induction and viral clearance, we hypothesized that  
286 lethal HCoVs may be particularly sensitive to IFN signaling relative to common cold-associated  
287 viruses given that these lethal viruses encode numerous strategies to antagonize IFN responses.  
288 Various reports have highlighted a marked sensitivity of SARS-CoV-2 and MERS-CoV to IFN pre-

289 treatment<sup>58,59</sup>, however, few studies have queried the sensitivity of common cold-associated  
290 HCoVs to exogenous IFNs. To test this, nasal ALI cultures were pre-treated with type I (IFN- $\beta$ ) or  
291 type III (IFN- $\lambda$ ) IFN (100 units/mL in the basal medium) 16 hours prior to infection and then viral  
292 replication was quantified at 24-hour intervals until 96 hpi (**Figure 5**). Interestingly, replication of  
293 all four HCoVs (SARS-CoV-2, MERS-CoV, HCoV-NL63, and HCoV-229E) was nearly completely  
294 inhibited by treatment with either IFN- $\beta$  or IFN- $\lambda$ . HRV-16 and IAV, on the other hand, exhibited  
295 intermediate sensitivity to IFN pre-treatments. Replication of both HRV-16 and IAV was reduced  
296 following IFN- $\beta$  pre-treatment, though not to the degree observed for HCoVs (in which case,  
297 replication was near the limit of detection for all IFN pre-treatments). HRV-16 and IAV were also  
298 largely insensitive to IFN- $\lambda$ , which is consistent with reports that IFN- $\lambda$  can be less potent than  
299 type I IFN in certain contexts<sup>60,61</sup>. These findings may explain the lack of viral clearance during  
300 IAV infection despite IAV being associated with the most robust IFN signaling responses in our  
301 respiratory virus panel (**Figures 1B, 2D**). Our data highlight the uniform sensitivity of HCoVs to  
302 either type I or type III IFN pre-treatment, consistent with IFN-mediated viral clearance for  
303 common cold-associated HCoVs and antagonism of IFN responses by the lethal HCoVs.

304

### 305 **Temperature-mediated defects in replication of common cold-associated viruses are** 306 **related to IFN signaling**

307 Our prior report comparing HCoV infections in nasal ALI cultures demonstrated that HCoV-229E,  
308 HCoV-NL63, and SARS-CoV-2 (at late time points) have a clear preference for replication at 33°C  
309 (nasal airway temperature) relative to 37°C (lung temperature), whereas MERS-CoV exhibited no  
310 differences in replication if cultures were incubated at either temperature<sup>40</sup>. HRV has also been  
311 shown to replicate more efficiently at (33°C), suggesting that this may be another common feature  
312 of common cold-associated viruses. The IAV isolate (H1N1 Brisbane/2007) used in this study

313 exhibited no differences in replication if nasal cell infections were conducted at 33°C or 37°C,  
314 which was additionally confirmed for MERS-CoV (**Supplement S3**).

315

316 Given our data indicating the impact of antiviral IFN responses in restricting viral replication, we  
317 sought to determine how IFN responses were regulated by temperature in nasal ALI cultures. We  
318 conducted nasal cell infections at 33°C or 37°C with each of the four viruses that exhibited a  
319 replication preference for nasal airway temperatures – both common cold-associated HCoVs,  
320 HRV-16, as well as SARS-CoV-2 at late time points. Protein lysates from infected cultures were  
321 collected at various times post infection for analysis by western blot to compare IFN responses at  
322 33°C with those at 37°C. Representative data is shown for HCoV-NL63 (**Figure 6A**) and SARS-  
323 CoV-2 (**Figure 6B**). During HCoV-NL63 infection, levels of STAT1 phosphorylation as well as  
324 representative ISGs (IFIT1, Viperin, MDA5) are significantly upregulated when infections are  
325 conducted at 37°C relative to 33°C. This increased IFN signaling is most apparent at early time  
326 points (24, 48 hpi). Viral replication is relatively similar at 33°C vs. 37°C at these early time points  
327 (**Figure 6C**), however, enhanced IFN responses at 37°C mediate more efficient restriction of viral  
328 replication (relative to 33°C), resulting in more rapid viral clearance. An observable “switch” then  
329 occurs, whereby prolonged viral replication at 33°C results in relatively higher IFN responses  
330 compared to 37°C at later time points (96, 144 hpi), after IFN-mediated clearance occurs at 37°C.  
331 For SARS-CoV-2, the most robust STAT1 phosphorylation as well as downstream ISG protein  
332 expression occurred at 144 hpi at 37°C, the time point immediately prior to the observed growth  
333 defect of SARS-CoV-2 at 37°C (**Figure 6D**). Evidence of increased IFN response following SARS-  
334 CoV-2 infection at 37°C relative to 33°C is apparent as early as 96 hpi. When SARS-CoV-2-  
335 infected nasal cells were incubated at 33°C, IFN signaling responses never reached the level of  
336 induction observed during infections conducted at 37°C. Similar data for HCoV-229E and HRV-  
337 16 are shown in **Supplement S4**, illustrating enhanced IFN responses at 37°C during infection  
338 with each of these common cold-associated viruses.

339

340 To determine if temperature-dependent IFN responses contributed to restriction of viral replication  
341 at 37°C, we further conducted nasal cell infections at each temperature in the presence or  
342 absence of RUX to impair IFN signaling (**Figure 6B, 6D**). The defect in replication during HCoV-  
343 NL63 infection at 37°C is completely rescued to the levels of virus observed at 33°C in cells that  
344 were treated with RUX. Indeed, viral titers in the 33°C RUX and the 37°C RUX treated conditions  
345 were not significantly different at any time during HCoV-NL63 infection (**Figure 6B**). RUX  
346 treatment similarly rescued the temperature-mediated growth defect of HCoV-229E (**Supplement**  
347 **S4C**). Given the delayed IFN induction by SARS-CoV-2, as well as its delayed temperature  
348 phenotype (exhibiting preferred replication at 33°C only at very late time points concurrent with  
349 IFN induction), growth curves for SARS-CoV-2 were extended to 240 hpi (**Figure 6D**). Although  
350 RUX treatment had minimal impact on SARS-CoV-2 titers at 33°C (consistent with data shown in  
351 **Figure 4**), it had a more dramatic impact on SARS-CoV-2 replication at 37°C. Similar to  
352 observations for HCoV-NL63 and HCoV-229E, RUX treatment nearly completely rescued the  
353 defect in replication at 37°C during SARS-CoV-2 infections at late time points. Interestingly, RUX  
354 treatment did not similarly rescue the temperature-mediated growth defect of HRV-16, though a  
355 slight increase in viral titer was observed when HRV-16-infected cultures were incubated at 37°C  
356 in the presence of RUX (relative to 37°C vehicle control-treated cultures) (**Supplement S4D**).  
357 RUX treatment had a much more robust impact on HRV-16 titers at 33°C, resulting in complete  
358 impairment of viral clearance (**Figure 3A**). Taken together, heightened IFN signaling responses  
359 at 37°C mediate restriction of common cold-associated HCoVs as well as SARS-CoV-2 at late  
360 time points in primary nasal ALL cultures and thus contribute to optimal replication of these viruses  
361 at nasal airway temperatures.

362

363 **The omicron BA.1 variant of SARS-CoV-2 exhibits some, but not all, features of common-**  
364 **cold associated viruses**

365 The dominant SARS-CoV-2 omicron variant of concern (VOC) has been associated with  
366 heightened replication in the upper respiratory tract, increased transmissibility, as well as a  
367 propensity to cause common cold-like symptoms (such as runny nose and sore throat)<sup>62,63</sup>. Thus,  
368 we compared the ancestral SARS-CoV-2/WA-1 (used for all SARS-CoV-2 experiments previously  
369 described) with omicron BA.1 in this nasal cell model to determine if SARS-CoV-2 had evolved to  
370 exhibit features of common cold-associated viruses. Comparing the replication kinetics of SARS-  
371 CoV-2 WA-1 with omicron BA.1 at 33°C confirmed a number of reports which have found that  
372 omicron replicates more rapidly in nasal cultures<sup>64,65</sup>. Omicron BA.1 replication reached peak  
373 titers by 48 hpi, whereas SARS-CoV-2 WA-1 titers peaked at 144 hpi (**Figure 7A**). Though we  
374 initially hypothesized that omicron BA.1 would exhibit increased temperature sensitivity with a  
375 more significant decline in viral titers than occurs during SARS-CoV-2 WA-1 infection at 37°C, we  
376 found in contrast that omicron BA.1 replication was markedly insensitive to temperature when  
377 comparing replication at 33°C vs 37°C (**Figure 7A**). Omicron titers remained at peak levels at late  
378 time points (as late as 240 hpi) when infections were conducted at either temperature, suggesting  
379 that omicron BA.1 does not undergo clearance by nasal epithelial cells as we observed for  
380 common cold-associated viruses.

381

382 To assess the degree of IFN signaling pathway induction during omicron infection, we performed  
383 western blot analysis using protein extracted from SARS-CoV-2 WA-1- or omicron BA.1-infected  
384 nasal cells, which revealed an increase in STAT1 phosphorylation as well as ISG protein  
385 abundances during omicron BA.1 infection relative to SARS-CoV-2 WA-1 (**Figure 7B**)<sup>65</sup>. Finally,  
386 since clearance of common cold-associated viruses was associated with IFN responses, we  
387 compared the sensitivity of omicron BA.1 with the earlier isolate, SARS-CoV-2 WA-1 (**Figure 7C**).  
388 Pre-treatment with either type I (IFN- $\beta$ ) or type III (IFN- $\lambda$ ) IFN was strongly antiviral against SARS-  
389 CoV-2 WA-1, nearly completely restricting viral replication. However, omicron BA.1 was much less  
390 sensitive to either of these IFN pre-treatments, replicating to high titers in the presence of strong



391 and sustained IFN responses in primary nasal cells. Thus, the omicron BA.1 variant has a unique  
392 phenotype, whereby it induces stronger IFN responses in nasal cell cultures than SARS-CoV-2  
393 WA-1 but exhibits reduced IFN sensitivity and therefore does not illustrate temperature sensitivity  
394 nor does it undergo IFN-mediated clearance.  
395

## 396 5.4 DISCUSSION

397 Efficient induction of antiviral IFN signaling in the nasal epithelium has the potential to restrict the  
398 spread of respiratory viruses to the lower airway, thus preventing the development of more severe  
399 lung disease. Viruses such as HRV-16, HCoV-229E, and HCoV-NL63 are typically associated  
400 with upper respiratory tract replication and symptoms, as well as early resolution of infection.  
401 Reports of IFN-mediated restriction of HRVs, as well as recent nasopharyngeal sequencing  
402 studies of COVID-19 patients that correlate early nasal IFN induction with reduced disease  
403 severity suggest that IFN responses in the nasal epithelium may be critical determinants of  
404 disease course<sup>16–18,66,67</sup>. Relatively few studies have utilized nasal cell models to compare  
405 common cold-associated viruses with more lethal respiratory viruses. Additionally, the common  
406 cold-associated HCoVs have been largely overlooked in respiratory virus research due to  
407 difficulties using these viruses in traditional cell culture systems as well as minimal interest prior  
408 to the COVID-19 pandemic. Thus, we have compared a panel of respiratory viruses spanning  
409 three virus families and encompassing diverse clinical phenotypes during human infection in a  
410 primary nasal ALI culture model. HRV-16, a prototypical common cold virus of the *Picornaviridae*  
411 family, as well as the alphacoronaviruses HCoV-229E and HCoV-NL63, are used to model  
412 common cold-associated infections, while lethal betacoronaviruses SARS-CoV-2 and MERS-  
413 CoV, as well as the *Orthomyxoviridae* family member IAV (H1N1/Brisbane 2007) serve as  
414 comparators associated with more severe respiratory disease. We identified and characterized  
415 three features of common cold-associated viral infections in our nasal cell model: robust, early  
416 induction of IFN responses, IFN-mediated clearance, and restriction of viral replication at elevated  
417 temperatures.

418

419 The replication cycle of all three common cold-associated viruses was characterized by an early  
420 peak in viral replication followed by clearance to the limit of detection at late time points post  
421 infection (**Figure 1A**). Abrogation of IFN signaling with RUX rendered nasal cells unable to clear

422 common cold-associated viruses, suggesting that restriction of viral replication is IFN-mediated  
423 (**Figure 3**). The nasal ALI cultures are composed of various epithelial cell populations (ciliated,  
424 goblet, and basal cells), but notably do not contain resident innate immune cell populations such  
425 as macrophages or dendritic cells that would be present in an *in vivo* nasal epithelium. This  
426 suggests that efficient induction of antiviral IFN responses by nasal epithelial cells may be  
427 sufficient to significantly limit replication of these viruses and curtail further viral spread, which  
428 likely contributes to reduced disease severity. It is also plausible that early IFN responses by nasal  
429 epithelial cells suppress initial viral replication, allowing for the recruitment of myeloid cell  
430 populations to the nasal epithelium which additionally contribute to viral clearance.

431

432 In contrast to this IFN-mediated clearance following infection with common cold-associated  
433 viruses, nasal cultures infected with SARS-CoV-2, MERS-CoV, or IAV were unable to clear these  
434 viruses (**Figure 1B**). This likely results at least in part from shutdown (for MERS-CoV) or  
435 significant delay (for SARS-CoV-2) of IFN responses. Indeed, infections with SARS-CoV-2 or  
436 MERS-CoV mutants with inactivated or deleted IFN antagonists resulted in a phenotype similar  
437 to that observed for HRV-16 and the common cold-associated HCoVs – with robust IFN/ISG  
438 responses that significantly restricted viral replication (**Figure 4**). We hypothesize that evasion of  
439 antiviral IFN responses is a crucial factor that allows these lethal HCoVs to replicate in the nasal  
440 epithelium and subsequently spread to the lower airway. An interesting parallel can be drawn for  
441 MERS-CoV, which causes predominantly upper respiratory tract illness in its animal reservoir,  
442 dromedary camels<sup>68,69</sup>. Induction of antiviral innate immunity in the camel upper airway has yet to  
443 be characterized, and this may be responsible for the restriction of MERS-CoV replication in  
444 camels to the upper airway, resulting in a common cold-like phenotype and limited spread to the  
445 camel airway. Receptor distribution may also contribute to this phenomenon, as comparative  
446 analysis of the MERS-CoV receptor, dipeptidyl peptidase 4 (DPP4), in camel and human airways  
447 has shown high expression of DPP4 in the camel upper airway<sup>70,71</sup>.

448

449 Exemplifying an intermediate phenotype, SARS-CoV-2 infection induces delayed IFN responses  
450 in the nasal cell model (**Figure 2D**), with pronounced IFN induction similar to that seen early  
451 during common cold-associated virus infections, although not detected until 192 hpi. As a result  
452 of this delayed IFN induction, SARS-CoV-2 replication is sustained at late times post infection.  
453 Our data are consistent with a prior study that described IFN induction by SARS-CoV-2 as delayed  
454 relative to IAV in nasal cells<sup>37</sup>. Interestingly, when we conducted SARS-CoV-2 infections at 37°C,  
455 we observed earlier and more robust ISG responses and a subsequent trend toward viral  
456 clearance (**Figure 6**). The timing of IFN responses has been shown to be a critical determinant  
457 of pathogenesis, whereby IFN induction too late following infection can worsen outcomes in a  
458 mouse model of MERS-CoV infection<sup>72,73</sup>. Thus, characterizing this delay in IFN induction during  
459 SARS-CoV-2 infection may provide insight into the marked variability in COVID-19 severity. The  
460 mechanism(s) contributing to delayed IFN induction by SARS-CoV-2 have not been fully  
461 elucidated but is likely at least partially due to its various IFN antagonists, including the conserved  
462 CoV nsp15 EndoU. When we infect with a SARS-CoV-2 mutant lacking nsp15 EndoU activity,  
463 SARS-CoV-2 undergoes IFN-mediated clearance (**Figure 4D**)<sup>57</sup>. In addition, accessory proteins  
464 encoded in genes ORF6 and ORF8 have been reported to have IFN antagonist functions<sup>30,32,74</sup>.  
465 For example, the SARS-CoV-2 ORF6 protein inhibits IFN signaling via blockade of STAT protein  
466 translocation into the nucleus, a process that is important for induction of IFN transcription<sup>31,74-78</sup>.  
467 Thus, our data indicate that modulating IFN responses via changes in temperature or via  
468 inactivation of SARS-CoV-2 IFN antagonists resulted in SARS-CoV-2 exhibiting features of  
469 common cold-associated viral infections in nasal epithelial cells.

470

471 In addition to viral immune antagonism, our data substantiate a role for temperature-dependent  
472 regulation of IFN responses as another factor that may contribute to restriction of common cold-  
473 associated viruses to the upper airway. In vitro transcription models posit that small but

474 physiologic increases in temperature can impact alternative splicing and other signaling events  
475 leading to increased IFN pathway induction at higher temperatures<sup>79</sup>. HRV-16 as well as both  
476 common cold-associated HCoVs included in this study replicated more efficiently at 33°C,  
477 exhibiting enhanced relative clearance at 37°C. This is consistent with a study using a mouse-  
478 adapted rhinovirus that suggests enhanced IFN responses at 37°C (lung temperature) compared  
479 to 33°C (nasal airway temperature) limit rhinovirus replication<sup>41,42</sup>. SARS-CoV-2 also had a  
480 preference for replication at 33°C at late times, concurrent with its delayed IFN signature.  
481 Interestingly, while RUX treatment to inhibit IFN signaling led to nearly complete rescue of this  
482 temperature-dependent attenuation for SARS-CoV-2, HCoV-NL63, and HCoV-229E, only partial  
483 restoration of replicaton was observed for HRV-16 (**Supplement S4**). This observation suggests  
484 that other factors may contribute to the replication defect of HRV-16 at 37°C. This could be related  
485 to cell death pathways or other dsRNA-induced antiviral pathways, such as RNase L and PKR  
486 which have been associated with temperature during HRV infections<sup>42</sup>. However, OASs as well  
487 as PKR, the dsRNA sensors responsible for RNase L and PKR pathway activation, respectively,  
488 are ISGs upregulated following IFN induction, and thus these pathways are likely minimally  
489 activated in the presence of RUX. Thus, it is likely that additional virus-related factors related to  
490 virion stability as well as virus-encoded enzyme function (viral polymerases or proteases, for  
491 example) may also contribute to temperature-mediated replication differences in addition to IFN  
492 signaling. *In vitro* studies of the IAV RNA-dependent RNA polymerase function propose that  
493 temperature can regulate viral replication machinery, though the impact of temperature on viral  
494 enzyme function has not been investigated during authentic infection<sup>80,81</sup>. Although additional  
495 mechanisms likely contribute, IFN responses that vary along physiologic airway temperatures  
496 may be critical in restricting common cold-associated viruses from spreading to the lower airway,  
497 especially during HCoV infection in which RUX treatment rescued temperature defects in our  
498 model. Future studies will compare temperature-dependent IFN-mediated restriction of common

499 cold-associated viruses using epithelial cells derived from the upper and lower airway to  
500 determine if this mechanism is more robust in nasal cells.

501

502 The seasonal IAV isolate used in this study (H1N1 Brisbane/2007) illustrates a unique phenotype.  
503 It resembles common cold-associated viruses with robust, early IFN induction, however, these  
504 IFN responses were insufficient to mediate viral clearance, and IAV also did not preferentially  
505 replicate at nasal airway temperatures. This may be due to decreased sensitivity to IFN responses  
506 (especially IFN- $\lambda$ ). Strong induction of IFN occurred, surprisingly, despite IAVs encoding a potent  
507 and well-characterized IFN antagonist, the NS1 protein, which possesses dsRNA-binding function  
508 and also limits IFN signaling induction<sup>82-85</sup>. Future studies with an IAV mutant lacking expression  
509 of this NS1 protein would be informative, as we hypothesize that such a virus may illustrate IFN-  
510 mediated temperature sensitivity as well as clearance by nasal epithelial cells, mirroring  
511 phenotypes for SARS-CoV-2 and MERS-CoV mutants lacking their IFN antagonists. Analysis of  
512 more recent omicron subvariants in our nasal model may indicate further evolution of SARS-CoV-  
513 2 with respect to its interaction with the IFN signaling response.

514

515 Sensitivity to IFN pre-treatments was a universal feature among all four HCoVs used in this study.  
516 However, reduced IFN sensitivity was also observed for the SARS-CoV-2 omicron BA.1 VOC in  
517 our model. Though most studies have emphasized mutations in the spike proteins of the SARS-  
518 CoV-2 variants, which mediate antibody escape and increased transmissibility, a growing number  
519 of reports identify differences in innate immune induction and IFN sensitivity among VOCs.  
520 Indeed, the still-dominant omicron variant replicates more rapidly in upper airway models and  
521 seems to replicate less efficiently than early SARS-CoV-2 isolates in lung-derived epithelial cell  
522 lines such as Calu3 and lower airway ALI cultures<sup>64,86,87</sup>. Though the degree of IFN induction  
523 during omicron infection relative to early SARS-CoV-2 isolates is a topic of debate<sup>88,89</sup>, a  
524 consensus has emerged in the literature that suggests SARS-CoV-2 VOCs (and especially

525 omicron BA.1) have enhanced IFN resistance, which is consistent with our data<sup>87,90–92</sup>. This  
526 reduced IFN sensitivity likely explains the lack of clearance and temperature sensitivity observed  
527 during omicron BA.1 infection in our nasal cell model, which parallels our observations during IAV  
528 infection. Mutations associated with IFN resistance in SARS-CoV-2 VOCs have yet to be clearly  
529 identified, although mutations in nonstructural proteins nsp3, nsp6, and nsp12 as well as  
530 accessory gene ORF6 may play a role<sup>31,92</sup>. Such differences in IFN sensitivity represent another  
531 factor that likely contributes to infection outcome and early restriction of viral replication in the  
532 nasal epithelium.

533

534 Leveraging a primary nasal cell model to compare respiratory viruses associated with a range of  
535 clinical pathologies, we propose that common cold-associated viruses induce temperature-  
536 regulated IFN responses that restrict viral replication. IFN antagonism by lethal HCoVs and  
537 reduced IFN sensitivity in the case of IAV and the omicron BA.1 variant of SARS-CoV-2 hinder  
538 viral clearance in nasal cell cultures. It would be informative to evaluate this model with additional  
539 respiratory viruses, both common cold-associated viruses (such as the paramyxovirus respiratory  
540 syncytial virus and respiratory adenoviruses) as well as additional lethal viruses (pandemic strains  
541 of IAV as well as SARS-CoV). Early comparisons of the IFN sensitivity of SARS-CoV and SARS-  
542 CoV-2 suggest that SARS-CoV-2 was more IFN-sensitive<sup>58</sup>, so we hypothesize that SARS-CoV  
543 would not undergo IFN-mediated clearance in nasal cells, irrespective of the degree of IFN  
544 induced. This would correlate with heightened severity of clinical disease in SARS-CoV infection  
545 relative to SARS-CoV-2. A model whereby highly lethal HCoVs such as MERS-CoV and SARS-  
546 CoV either shutdown IFN responses or are insensitive to IFN responses in the nasal epithelium  
547 may allow for uninhibited dissemination to the lower airway where they cause more severe  
548 respiratory disease.

549

550 Thus, antiviral IFN responses in the nasal epithelium mediate early control of viral replication and  
551 limit spread to the lower airway and are likely key determinants of respiratory viral disease. Our  
552 comparative approach characterizing innate immune responses during diverse respiratory virus  
553 infections improves our understanding of the mechanisms differentiating common cold-  
554 associated viral infections from those associated with more severe disease. Awareness of these  
555 virus-host interactions will help to define risk factors associated with severe disease and allow for  
556 the development of antiviral therapies that decrease the global burden of respiratory viruses.  
557



558 **Acknowledgments**

559 We thank members of the Weiss lab for feedback and discussion of this project. We thank Dr.  
560 Anthony Fehr and Dr. Luis Martinez-Sobrido for construction of MERS-CoV and SARS-CoV-2  
561 recombinant viruses, Dr. Scott Hensley for providing the seasonal influenza isolate as well as  
562 MDCK cells used in the study, Dr. Andrew Vaughan for providing an additional source of MDCK  
563 cells. We thank Drs. David W. Kennedy, James N. Palmer, Nithin D. Adappa, and Michael A.  
564 Kohanski for aid in the collection of nasal tissue for establishing primary nasal epithelial cultures.  
565 This work was supported by National Institutes of Health grants R01 AI140442 (SRW),  
566 R01AI169537 (SRW&NAC), Department of Veterans Affairs Merit Review 1-I01-BX005432-01  
567 (NAC&SRW), the Penn Center for Research on Coronaviruses and Other Emerging Pathogens  
568 (SRW). CO was supported in part by F30AI172101 and T32AI055400 and AF in part by  
569 T32AI007324.

570

571

572 **Respective Contributions**

573 Designed research: CJO, NAC, SRW

574 Performed research: CJO, DMR, LHT

575 Contributed new reagents/analytic tools: DMR, LHT

576 Analyzed data: CJO, DMR, AF, NAC, SRW

577 Wrote manuscript: CJO

578 Revised manuscript: CJO, AF, DMR, NAC, SRW

579

580 **Competing Interest / Disclosures Statement:**

581 Susan R Weiss is on the Scientific Advisory Board of Ocugen, Inc. and consults for Powell Gilbert

582 LLP. Noam A Cohen consults for GSK, AstraZeneca, Novartis, Sanofi/Regeneron; has US Patent

583 "Therapy and Diagnostics for Respiratory Infection" (10,881,698 B2, WO20913112865) and a

584 licensing agreement with GeneOne Life Sciences.

585

586 **FIGURE LEGENDS**

587 **Figure 1 Respiratory viruses exhibit two distinct replication phenotypes in primary nasal**  
588 **epithelial cells.** Pooled-donor nasal ALI cultures were infected at the apical surface with the  
589 indicated virus (MOI = 1 PFU/cell, 33°C). Apical surface liquid (ASL) was collected at the indicated  
590 time points post infection and quantified via plaque assay. Averaged titers from infections in six  
591 independent sets of pooled-donor ALI cultures are shown in (A) for HCoV-NL63, HCoV-229E, and  
592 HRV-16 and in (B) for SARS-CoV-2, MERS-CoV as mean  $\pm$  standard deviation (SD). The dotted  
593 line indicates the plaque assay limit of detection (LOD).

594  
595 **Figure 2 Common cold-associated viruses induce robust, early IFN responses.** Nasal ALI  
596 cultures were infected with each virus (MOI = 1, 33°C), cells were lysed at 96 hpi (SARS-CoV-2,  
597 MERS-CoV, HCoV-229E, HCoV-NL63) or 48 hpi (HRV-16, IAV), RNA extracted and analyzed by  
598 RNA-seq. (A) Volcano plots for differentially expressed genes for each virus relative to mock-  
599 infected cultures. Genes involved in the IFN signaling response are indicated in green.  
600 Significance cutoffs were indicated by dotted lines for both  $\log_2$  fold change values and adjusted  
601 p-values (padj). (B) The number of ISGs reaching significance thresholds for each respiratory  
602 virus was quantified. (C) Heatmap generated via hierarchical clustering of IFN-related genes.  
603 Viruses were ranked in terms of degree of induction of each ISG based on DESeq2 stat values,  
604 from least upregulated (blue) to most upregulated (red). Data from mock-infected cultures was  
605 included and set to row minimum for each gene. (D) Western blot analysis of whole cell lysates  
606 collected at indicated times following infection. Time point for this analysis is matched to the time  
607 point analyzed via RNAseq, except for SARS-CoV-2, for which an additional sample at 192 hpi  
608 was included. Samples were separated via SDS-PAGE followed by transfer on to a PVDF  
609 membrane for detection using indicated antibodies.

610

611 **Figure 3 Clearance of common cold-associated viruses is IFN-mediated.** Nasal ALI cultures  
612 were pre-treated with either ruxolitinib (RUX) or DMSO (vehicle) control at a concentration of 10  
613  $\mu\text{M}$  in the basal media for 48 hours prior to infection, followed by infection in triplicate with the  
614 indicated virus (MOI = 1, 33°C). (A) ASL was collected at the indicated time points, released virus  
615 quantified via plaque assay, and the average viral titer in each condition is shown as mean  $\pm$   
616 standard deviation (SD). (B) Trans-epithelial electrical resistance (TEER) was measured prior to  
617 infection (0 hpi) and at 48-hour intervals following infection. Average TEER values from triplicate  
618 transwells in each condition are shown as mean  $\pm$  SD. Statistical significance of differences in  
619 titer (A) or TEER (B) in RUX-treated vs. control cultures was calculated by repeated measures  
620 two-way ANOVA: \*,  $P \leq 0.05$ ; \*\*,  $P \leq 0.01$ ; \*\*\*,  $P \leq 0.001$ ; \*\*\*\*,  $P \leq 0.0001$ . Comparisons that were  
621 not statistically significant are not labeled. Data shown is from one experiment representative of  
622 three (A) or two (B) independent experiments, each performed in triplicate using pooled-donor  
623 nasal ALI cultures derived from four to six individual donors.

624

625 **Figure 4 Lethal HCoVs with inactivated IFN antagonists exhibit IFN-mediated clearance.**

626 (A-B) Western blot analysis of protein from cells lysed at indicated times post infection with (A)  
627 WT MERS-CoV and MERS-nsp15<sup>mut</sup>/ΔNS4a or (B) WT SARS-CoV-2 and SARS-CoV-2 nsp15<sup>mut</sup>.  
628 Proteins were separated via SDS-PAGE followed by transfer on to a PVDF membrane for  
629 detection using indicated antibodies. (C-D) Nasal ALI cultures were pre-treated with either  
630 ruxolitinib (RUX) or DMSO control at a concentration of 10  $\mu\text{M}$  in the basal media for 48 hours  
631 prior to infection. Cultures were then infected in triplicate (MOI = 1, 33°C) with either (C) MERS-  
632 nsp15<sup>mut</sup>/ΔNS4a or WT MERS-CoV or (D) SARS-CoV-2 nsp15<sup>mut</sup> and WT SARS-CoV-2. ASL was  
633 collected at indicated time points after infection and infectious virus was quantified via plaque  
634 assay. Average viral titer for each virus/drug condition is shown as mean  $\pm$  SD. Statistical  
635 significance of differences in titer between each condition was calculated by repeated measures  
636 two-way ANOVA and shown as a table: \*,  $P \leq 0.05$ ; \*\*,  $P \leq 0.01$ ; \*\*\*,  $P \leq 0.001$ ; \*\*\*\*,  $P \leq 0.0001$ .

637 Data shown is from one experiment representative of two independent experiments, each  
638 performed in triplicate using pooled-donor nasal ALI cultures derived from four to six individual  
639 donors.

640

641 **Figure 5 Respiratory viruses are differentially sensitive to IFN pre-treatments in primary**  
642 **nasal epithelial cells.** IFN- $\beta$  or IFN- $\lambda$  (100 units/ml) was added to the basal media of nasal ALI  
643 cultures or control cultures were mock-treated. 16 hours later, cultures were infected with  
644 indicated virus (MOI = 1, 33°C). ASL collected at 24-hour intervals following infection was used  
645 for quantification of infectious virus release by plaque assay. Average viral titers are shown as  
646 mean  $\pm$  SD, with plaque assay limit of detection (LOD) indicated by dotted line. Statistical  
647 significance of differences in average titer in IFN-treated cultures compared to untreated cultures  
648 was calculated via repeated measures two-way ANOVA: \*,  $P \leq 0.05$ ; \*\*,  $P \leq 0.01$ ; \*\*\*,  $P \leq 0.001$ ;  
649 \*\*\*\*,  $P \leq 0.0001$ . Comparisons that were not statistically significant are not labeled. Data shown  
650 is the average of two experiments performed using independent batches of donor nasal ALI  
651 cultures, each derived from four to six donors.

652

653 **Figure 6 Enhanced IFN responses restrict replication of common cold-associated viruses**  
654 **at elevated temperature.** (A,B) Nasal ALI cultures were equilibrated at indicated temperature  
655 (33°C or 37°C) for 48 hours prior to infection by HCoV-NL63 (A) or SARS-CoV-2 (B). Western blot  
656 analysis was performed using lysates of cells harvested at indicated time points. Immunoblots  
657 were probed with antibodies against indicated proteins involved in the IFN signaling response.  
658 Data shown are from one experiment representative of three independent experiments conducted  
659 in separate batches of pooled-donor nasal cultures. (C,D) Cultures were pre-treated with either  
660 RUX or DMSO at 10  $\mu$ M in the basal media at the start of temperature equilibration 48 hours pre-  
661 infection. Cultures were then infected with HCoV-NL63 (C) or SARS-CoV-2 (D) in triplicate (MOI  
662 = 1), ASL collected at indicated time points and infectious virus quantified by plaque assay.

663 Average viral titer for is shown as mean  $\pm$  SD. Statistical significance of differences in titer between  
664 each condition was calculated by repeated measures two-way ANOVA and shown as a table: \*,  
665  $P \leq 0.05$ ; \*\*,  $P \leq 0.01$ ; \*\*\*,  $P \leq 0.001$ ; \*\*\*\*,  $P \leq 0.0001$ . Data shown are from one experiment  
666 representative of three independent experiments, each performed in triplicate using independent  
667 batches of pooled-donor cultures.

668

669 **Figure 7 Omicron BA.1 exhibits a unique phenotype in primary nasal epithelial cells. (A)**

670 Nasal ALI cultures were equilibrated at the indicated temperature for 48 hours and then infected  
671 with either SARS-CoV-2 (WA-01) or omicron BA.1 (MOI = 1). ASL was collected at indicated times  
672 and released infectious virus quantified by plaque assay. Data shown are the average from three  
673 independent experiments. (B) Western blot analysis was performed using whole cell lysates  
674 collected at indicated time points after infections with SARS-CoV-2 WA-01 or omicron BA.1 (MOI  
675 = 1, 33°C). Data shown are from one representative of four experiments conducted in independent  
676 batches of pooled-donor nasal cultures. (C) Nasal ALI cultures, pre-treated with IFN- $\beta$  or IFN- $\lambda$   
677 for 16 hours were infected with either SARS-CoV-2 (WA-01) or omicron BA.1 (MOI = 1, 33°C),  
678 ASL was collected at 24-hour intervals and quantified for infectious virus by plaque assay. Data  
679 shown is the average of two independent experiments. Statistical significance of differences in  
680 titer for each virus at 33°C vs. 37°C (A) or in IFN-treated vs. untreated cultures (C) was calculated  
681 via repeated measures two-way ANOVA: \*,  $P \leq 0.05$ ; \*\*,  $P \leq 0.01$ ; \*\*\*,  $P \leq 0.001$ ; \*\*\*\*,  $P \leq 0.0001$ .  
682 Comparisons that were not statistically significant are not labeled.

683 **TABLES**

684 **Table 1. Plaque assay conditions for each respiratory virus**

| <b>Virus</b> | <b>Cell line used for infectious virus quantification</b> | <b>Temperature of plaque assay</b> | <b>Incubation period</b> |
|--------------|-----------------------------------------------------------|------------------------------------|--------------------------|
| SARS-CoV-2   | VeroE6                                                    | 37°C                               | 3 days                   |
| MERS-CoV     | VeroCCL81                                                 | 37°C                               | 3 days                   |
| HCoV-229E    | Huh7                                                      | 33°C                               | 3 days                   |
| HCoV-NL63    | LLC-MK2                                                   | 33°C                               | 6 days                   |
| HRV-16       | HeLa                                                      | 33°C                               | 5 days                   |
| IAV          | MDCK                                                      | 37°C                               | 3 days                   |

685

686 **Table 2. Primers used for qPCR analysis**

| <b>Gene name</b> | <b>Primer orientation</b> | <b>Sequence</b>            |
|------------------|---------------------------|----------------------------|
| IFNL1            | Forward                   | CGCCTTGGAAGAGTCACTCA       |
|                  | Reverse                   | GAAGCCTCAGGTCCCAATTC       |
| IFNB             | Forward                   | GTCAGAGTGGAAATCCTAAG       |
|                  | Reverse                   | ACAGCATCTGCTGGTTGAAG       |
| IFIT1            | Forward                   | TGGTGACCTGGGGCAACTTT       |
|                  | Reverse                   | AGGCCTTGGCCCGTTCATAA       |
| IFIT2            | Forward                   | TGTCCAATGCAAATCCTGAGAAGC   |
|                  | Reverse                   | AAATGGAGCTGGCCCTCTTTGG     |
| RSAD2            | Forward                   | CACAAAGAAGTGTCTGCTTGGT     |
|                  | Reverse                   | AAGCGCATATATTCATCCAGAATAAG |
| CXCL10           | Forward                   | CCTGCAAGCCAATTTTGTCC       |
|                  | Reverse                   | ATGGCCTTCGATTCTGGATTC      |
| ISG15            | Forward                   | CATCTTTGCCAGTACAGGAGC      |
|                  | Reverse                   | GGGACACCTGGAATTCGTTG       |
| 18S              | Forward                   | TTCGATGGTAGTCGCTGTGC       |
|                  | Reverse                   | CTGCTGCCTTCCTTGAATGTGGTA   |

687 **Table 3. Antibodies used for western blotting**

| <b>Primary Antibody</b>    | <b>Antibody species</b> | <b>Blocking buffer</b>    | <b>Dilution</b> | <b>Catalog number</b>      |
|----------------------------|-------------------------|---------------------------|-----------------|----------------------------|
| p-STAT-1                   | Rabbit                  | 5% BSA in TBST            | 1:1000          | Cell Signaling 7649        |
| STAT1                      | Rabbit                  | 5% BSA in TBST            | 1:1000          | Cell Signaling 9172        |
| IRF3                       | Rabbit                  | 5% milk in TBST           | 1:1000          | Cell Signaling 4302        |
| IFIT1                      | Rabbit                  | 5% milk in TBST           | 1:1000          | Cell Signaling 14769       |
| Viperin                    | Rabbit                  | 5% milk TBST              | 1:1000          | Cell Signaling 13996       |
| MDA5                       | Rabbit                  | 5% milk TBST              | 1:1000          | Cell Signaling 5321        |
| p-PKR                      | Rabbit                  | 5% BSA in TBST            | 1:1000          | Abcam 32036                |
| PKR                        | Rabbit                  | 5% milk TBST              | 1:1000          | Cell Signaling 12297       |
| SARS-CoV-2 Nucleocapsid    | Rabbit                  | 5% milk TBST              | 1:2000          | Genetex GTX135357          |
| MERS-CoV Nucleocapsid      | Mouse                   | 5% milk TBST              | 1:2000          | Sino Biological 40068-MM10 |
| HCoV-229E Nucleocapsid     | Rabbit                  | 5% milk TBST              | 1:2000          | Sino Biological 40640-V07E |
| HCoV-NL63 Nucleocapsid     | Rabbit                  | 5% milk TBST              | 1:2000          | Sino Biological 40641-T62  |
| HRV-16 VP0/2               | Mouse                   | 5% milk TBST              | 1:1000          | QED Biosciences 18758      |
| IAV HA                     | Mouse                   | 5% milk TBST              | 1:2000          | Sigma H9658                |
| GAPDH                      | Rabbit                  | 5% milk or 5% BSA in TBST | 1:2000          | Cell Signaling 2118        |
| <b>Secondary Antibody</b>  | <b>Antibody species</b> | <b>Blocking buffer</b>    | <b>Dilution</b> | <b>Catalog number</b>      |
| Anti-rabbit IgG HRP-linked | Goat                    | Same as primary           | 1:3000          | Cell Signaling 7074        |
| Anti-mouse IgG HRP-linked  | Horse                   | Same as primary           | 1:3000          | Cell Signaling 7076        |

688

689



## 690 **MATERIALS AND METHODS**

### 691 **Growth and differentiation of nasal air-liquid interface (ALI) cultures**

692 Primary nasal cells were obtained via nasal cytologic brushing of patients in the Department of  
693 Otorhinolaryngology-Head and Neck Surgery, Division of Rhinology at the University of  
694 Pennsylvania and the Philadelphia Veteran Affairs Medical Center after obtaining informed  
695 consent. The full study protocol, including the acquisition and use of nasal specimens, was  
696 approved by the University of Pennsylvania Institutional Review Board (protocol #800614) and  
697 the Philadelphia VA Institutional Review Board (protocol #00781). Any patient with a history of  
698 systemic disease or who had recently taken immunosuppressive medications was excluded. After  
699 specimen acquisition, nasal ALI cultures were grown and differentiated on semipermeable  
700 transwell supports containing 0.4  $\mu\text{m}$  pores as previously described<sup>40,93-95</sup>. Pooled-donor nasal  
701 cultures were used for all infections in this study. Nasal epithelial cells derived from four or six  
702 individual donors were mixed in equal combinations prior to seeding on to transwell supports.  
703 Nasal cells were then grown to confluence with Pneumacult-Ex Plus growth medium present both  
704 apically and basally. After reaching confluence, apical medium was removed, and Pneumacult-  
705 ALI medium was used in the basal compartment to differentiate nasal ALI cultures. Basal media  
706 was replaced two times per week throughout the differentiation period (4 weeks total). All reagents  
707 used for nasal ALI culture growth and differentiation were acquired from Stemcell Technologies.  
708 Nasal ALI cultures were grown and differentiated at 37°C, followed by equilibration at either 33°C  
709 or 37°C for 48 hours prior to infection (indicated in figure legends).

710

### 711 **Viruses**

712 SARS-CoV-2 (USA-WA1/2020 strain) obtained via the Biodefense and Emerging Infections  
713 Research Resources Repository (BEI) was propagated in Vero-E6 cells. MERS-CoV was derived  
714 from a bacterial artificial chromosome (BAC) encoding the full-length MERS-CoV genome (HCoV-  
715 EMC/2012) and was propagated in Vero-CCL81 cells. HCoV-NL63 was propagated in LLC-MK2

716 cells. HCoV-NL63 stock underwent ultracentrifugation through a 20% sucrose layer to concentrate  
717 virus stock for infections as previously described<sup>96</sup>. HCoV-229E (ATCC-VR-740) was propagated  
718 in Huh7 cells. HRV-16 (ATCC-VR283) was propagated in HeLa cells. IAV (H1N1, Brisbane/2007)  
719 was a kind gift from the laboratory of Dr. Scott Hensley and was propagated on MDCK cells.  
720 SARS-CoV-2 and MERS-CoV recombinant viruses were generated SARS-CoV-2 and MERS-  
721 CoV BACs as previously described<sup>29,57,97</sup>. All virus stocks were sequenced and compared to wild-  
722 type reference sequences available via NCBI. All virus manipulations and infections that involved  
723 SARS-CoV-2 and MERS-CoV were conducted in a biosafety level 3 (BSL-3) facility following  
724 appropriate and approved personal protective equipment and protocols.

725

#### 726 **Infections and quantification of apically shed virus**

727 Viruses were diluted in serum-free Dulbecco's modified Eagle's medium (DMEM) to achieve MOI  
728 = 1 PFU/cell in a total inoculum volume of 50  $\mu$ l. For IAV infections, trypsin TPCK at a  
729 concentration of 2  $\mu$ g/ml was added to the inoculum to mediate initiation of infection. Viral inocula  
730 were added to the apical compartment of each transwell and allowed to adsorb for 1 hour with  
731 rocking. After 1 hour, cells were washed three times with phosphate-buffered saline (PBS), and a  
732 fourth PBS wash was collected to confirm adequate removal of input virus (0 hpi time point). At  
733 indicated times following infection, airway surface liquid (ASL) was collected via addition of 200  
734  $\mu$ l of PBS to the apical compartment. ASL samples were subsequently used for quantification of  
735 apically shed infectious virus via standard plaque assay as previously described<sup>40,44,95,96</sup>. A  
736 different cell line, incubation period, and temperature was used for titration of each virus, as  
737 described in **Table 1**.

738

739

#### 740 **Cell lines used for quantification of infectious virus by plaque assay**

741 VeroE6 cells (ATCC), VeroCCL81 cells (ATCC), HeLa cells (ATCC) and MDCK cells (gifted from  
742 Dr. Andy Vaughan and Dr. Scott Hensley) were cultured in Dulbecco's modified Eagle's medium  
743 (DMEM) containing 10% L-glutamine and 4.5g/L D-glucose (Gibco, ThermoFisher) supplemented  
744 with 10% heat inactivated fetal bovine serum (FBS) (Hyclone, Cytiva) and 1X  
745 penicillin/streptomycin (pen/strep) (Gibco, ThermoFisher). Huh7 cells (ATCC) were grown in the  
746 same media supplemented additionally with 1X non-essential amino acids (Gibco). LLC-MK2 cells  
747 were cultured in minimal essential media (MEM)- $\alpha$  supplemented with 10% FBS.

748

### 749 **Bulk RNA sequencing and analysis**

750 Nasal cultures were infected at MOI = 1 with the indicated viruses. Cells were lysed at 96 hpi  
751 (MERS-CoV, SARS-CoV-2, HCoV-229E, HCoV-NL63) or 48hpi (IAV and HRV-16) using RLT Plus  
752 buffer and total RNA was extracted using Qiagen RNeasy Plus Mini kit (cat. No. 74004). Samples  
753 were sequenced by Azenta Life Sciences with Illumina HiSeq PE 2x150. Read quality was  
754 assessed using FastQC v0.11.2<sup>98</sup>. Raw sequencing reads from each sample were quality and  
755 adapter trimmed using BBDuk 38.73<sup>99</sup>. The reads were then mapped to the human genome (hg38  
756 with Ensembl v98 annotation) using Salmon v0.13.1<sup>100</sup>. Differential expression between mock and  
757 infected experimental conditions were analyzed using the raw gene counts files by DESeq2  
758 v1.22.1<sup>45</sup>. Significance thresholds for significantly altered gene expression were set a log<sub>2</sub> fold  
759 change value of > 1 or < -1 and a p-adjusted value of less than 0.05. Volcano plots were generated  
760 using EnhancedVolcano v1.14.0<sup>101</sup>, with highlighted interferon stimulated genes (ISGs) being  
761 selected from the Molecular Signatures Database  
762 HALLMARK\_INTERFERON\_ALPHA\_RESPONSE gene list<sup>47</sup>. Genes within this pathway were  
763 parsed from each virus infection and the stat values calculated using DESeq2 were used to  
764 compare the magnitude of change for each. A heatmap was generated using these values with  
765 Morpheus (<https://software.broadinstitute.org/morpheus>), and genes were organized using  
766 hierarchical clustering.

767

## 768 **Reverse transcriptase (RT)-quantitative PCR for validation of RNA sequencing data**

769 Cells were lysed at indicated time points with buffer RLT Plus (Qiagen) and RNA was extracted  
770 according to manufacturer's protocol. RNA was then reverse transcribed to produce cDNA using  
771 a High-Capacity cDNA Reverse Transcriptase Kit (Applied Biosystems, ThermoFisher). This  
772 cDNA was amplified using specific qRT-PCR primers for each target gene (primer sequences in  
773 **Table 2**). Fold changes in mRNA levels for indicated IFNs and ISGs were reported as fold changes  
774 over mock-treated cultures, using the formula  $2^{-\Delta(\Delta Ct)}$ .

775

## 776 **Ruxolitinib treatments**

777 Basal media of nasal ALI cultures was supplemented with 10  $\mu$ M ruxolitinib (RUX) or DMSO  
778 (vehicle control). Basal media containing fresh RUX or DMSO was replaced at 0, 48, and 96 hpi.  
779 No detectable cytotoxicity was observed following RUX treatment as measured via lactate  
780 dehydrogenase assay.

781

## 782 **Measurement of trans-epithelial electrical resistance (TEER)**

783 TEER was quantified using an EVOM ohm-voltmeter (World Precision Instruments) as previously  
784 described<sup>40,95</sup>. Briefly: TEER was quantified prior to infection and then measured after infection  
785 by placing each infected transwell into the Endohm-6 measurement chamber with PBS containing  
786 calcium and magnesium in both the apical and basal compartment. TEER measurements were  
787 reported as Ohms-cm<sup>2</sup> using the surface area of transwells (0.33cm<sup>2</sup>).

788

## 789 **Interferon pre-treatments**

790 Nasal cultures were treated with 100 units/mL recombinant human IFN- $\beta$  (Peprotech) or IFN- $\lambda$ 1  
791 (BioLegend) 16 hours prior to infection (basally). Basal media was not changed following infection  
792 in IFN-treated cultures.

793

#### 794 **Western blot analysis**

795 Cell lysates were harvested at indicated time points using RIPA buffer (50mM Tris pH 8, 150mM  
796 NaCl, 0.5% deoxycholate, 0.1% SDS, 1% NP40) supplemented with protease inhibitors (Roche)  
797 and phosphatase inhibitors (Roche). Lysates were collected via scraping of entire surface of  
798 each transwell insert. Lysates were mixed 3:1 with 4X Laemmli sample buffer, boiled at 95°C for  
799 10 minutes, and then separated via sodium dodecyl sulfate-polyacrylamide gel electrophoresis  
800 (SDS/PAGE) and transferred to polyvinylidene difluoride membranes. Blots were blocked in  
801 either 5% bovine serum albumin (BSA) or 5% nonfat milk and probed with antibodies as  
802 indicated in **Table 3**. Blots were stripped sequentially using Thermo Scientific Restore Western  
803 Blot stripping buffer.

804

#### 805 **Data Availability**

806 Raw and processed RNA-seq data for all infection conditions will be deposited in the Gene  
807 Expression Omnibus database prior to publication. All other data are available upon request. Any  
808 material or related protocols mentioned in this work can additionally be obtained by contacting  
809 the corresponding author.

810

811 **Supplemental Figure Legends**

812 **S1 RT-qPCR validation of bulk RNA-Seq results.** Nasal ALI cultures were infected with each  
813 virus (MOI = 1, 33°C), lysed at 96 hpi (SARS-CoV-2, MERS-CoV, HCoV-229E, HCoV-NL63) or  
814 48 hpi (HRV-16, IAV), RNA extracted and analyzed by RT-qPCR with primers specific for indicated  
815 genes. Data are reported as fold changes relative to mock-infected cultures (calculated as  $2^{-\Delta(\Delta Ct)}$ ).  
816 Data shown are from one experiment representative of two experiments conducted in separate  
817 batches of pooled-donor nasal cultures.

818

819 **S2 Viral protein controls confirming infection by indicated viruses in Figure 2C.** Nasal ALI  
820 cultures were infected with each virus (MOI = 1, 33°C), lysed at 96 hpi (SARS-CoV-2, MERS-  
821 CoV, HCoV-229E, HCoV-NL63 N protein) or 48 hpi (HRV-16, IAV), and protein samples separated  
822 via SDS-PAGE followed by transfer on to a PVDF membrane for detection using indicated  
823 antibodies specific to surface proteins of each virus. This western blot corresponds to western  
824 blot shown in **Figure 2D**.

825

826 **S3 Temperature does not significantly impact replication of MERS-CoV or IAV.** Nasal ALI  
827 cultures were equilibrated at indicated temperature (33°C or 37°C) for 48 hours prior to infection  
828 by MERS-CoV (A) or IAV (B). ASL was collected at the indicated time points post infection and  
829 quantified via plaque assay. Averaged replication kinetics from infections in two independent sets  
830 of pooled-donor ALI cultures are shown in mean  $\pm$  SD. Statistical significance of differences in  
831 titer at 33°C vs. 37°C for each virus was calculated by repeated measures two-way ANOVA and  
832 shown as a table: \*,  $P \leq 0.05$ . Comparisons that did not reach significance are not labeled.

833

834 **S4 Temperature-dependent IFN responses during HCoV-229E and HRV-16 infection.** Nasal  
835 ALI cultures were equilibrated at indicated temperature (33°C or 37°C) for 48 hours prior to  
836 infection by HCoV-229E (A) or HRV-16 (B). Western blot analysis was performed using lysates of

837 cells harvested at indicated time points. Immunoblots were probed with antibodies against  
838 indicated proteins involved in the IFN signaling response. Data shown are from one representative  
839 of three independent experiments conducted in separate batches of pooled-donor nasal cultures.  
840 (C, D) Cultures were pre-treated with either RUX or DMSO at 10  $\mu$ M in the basal media at the  
841 start of temperature equilibration 48 hours pre infection. Cultures were then infected with HCoV-  
842 229E (C) or HRV-16 (D) in triplicate (MOI = 1), ASL collected at indicated time points and  
843 infectious virus quantified by plaque assay. Average viral titer for is shown as mean  $\pm$  SD.  
844 Statistical significance of differences in titer between each condition was calculated by repeated  
845 measures two-way ANOVA and shown as a table: \*,  $P \leq 0.05$ ; \*\*,  $P \leq 0.01$ ; \*\*\*,  $P \leq 0.001$ ; \*\*\*\*,  $P \leq$   
846 0.0001. Data shown are from one representative of three independent experiments, each  
847 performed in triplicate using independent batches of pooled-donor cultures.  
848

849 **REFERENCES**

- 850 1. Booth, T.F., Kournikakis, B., Bastien, N., Ho, J., Kobasa, D., Stadnyk, L., Li, Y., Spence, M.,  
851 Paton, S., Henry, B., et al. (2005). Detection of airborne severe acute respiratory  
852 syndrome (SARS) coronavirus and environmental contamination in SARS outbreak units.  
853 *Journal of Infectious Diseases* *191*, 1472–1477. 10.1086/429634.
- 854 2. Farzal, Z., Basu, S., Burke, A., Fasanmade, O.O., Lopez, E.M., Bennett, W.D., Ebert, C.S.,  
855 Zanation, A.M., Senior, B.A., and Kimbell, J.S. (2019). Comparative study of simulated  
856 nebulized and spray particle deposition in chronic rhinosinusitis patients. *Int Forum*  
857 *Allergy Rhinol* *9*, 746–758. 10.1002/alr.22324.
- 858 3. Gaeckle, N.T., Pragman, A.A., Pendleton, K.M., Baldomero, A.K., and Criner, G.J. (2020).  
859 The oral-lung axis: The impact of oral health on lung health. *Respir Care* *65*, 1211–1220.  
860 10.4187/respcare.07332.
- 861 4. Hou, Y., Okuda, K., Edwards, C., Martinez, D., Asakura, T., Randell, S., Boucher, R., and  
862 Baric, R. (2020). SARS-CoV-2 Reverse Genetics Reveals a Variable Infection Gradient in the  
863 Respiratory Tract. *Cell* *182*, 429–446.
- 864 5. Dewitte-Orr, S.J., and Mossman, K.L. (2010). DsRNA and the innate antiviral immune  
865 response. *Future Virol* *5*, 325–341. 10.2217/fvl.10.18.
- 866 6. Hur, S. (2019). Double-Stranded RNA Sensors and Modulators in Innate Immunity. *Annu*  
867 *Rev Immunol* *37*, 349–375. 10.1146/annurev-immunol-042718-041356.
- 868 7. Fehr, A., and Perlman, S. (2015). Coronaviruses: An Overview of their Replication and  
869 Pathogenesis. In *Methods in Molecular Biology*, pp. 1–23. 10.1007/978-1-4939-2438-7.
- 870 8. Platanius, L.C. (2005). Mechanisms of type-I- and type-II-interferon-mediated signalling.  
871 *Nat Rev Immunol* *5*, 375–386. 10.1038/nri1604.
- 872 9. Schoggins, J.W. (2019). Interferon-Stimulated Genes: What Do They All Do? *Annu Rev*  
873 *Virol* *6*. 10.1146/annurev-virology-092818-015756.
- 874 10. Schoggins, J., Wilson, S., Murphy, M., Jones, C., Bieniasz, P., and Rice, C.M. (2011). A  
875 diverse array of gene products are effectors of the type I interferon antiviral response.  
876 *Nature* *472*, 481–485. 10.1038/nature09907.A.
- 877 11. Malterer, M.B., Glass, S.J., and Newman, J.P. (2014). Interferon-stimulated genes: A  
878 complex web of host defenses. *Annu Rev Immunol* *44*, 735–745. 10.1038/jid.2014.371.
- 879 12. Balachandran, S., Kim, C.N., Yeh, W.C., Mak, T.W., Bhalla, K., and Barber, G.N. (1998).  
880 Activation of the dsRNA-dependent protein kinase, PKR, induces apoptosis through  
881 FADD-mediated death signaling. *EMBO Journal* *17*. 10.1093/emboj/17.23.6888.
- 882 13. Chakrabarti, A., Banerjee, S., Franchi, L., Loo, Y.M., Gale, M., Núñez, G., and Silverman,  
883 R.H. (2015). RNase L activates the NLRP3 inflammasome during viral infections. *Cell Host*  
884 *Microbe* *17*. 10.1016/j.chom.2015.02.010.
- 885 14. Ivinson, K., Deliyannis, G., McNabb, L., Grollo, L., Gilbertson, B., Jackson, D., and Brown,  
886 L.E. (2017). Salivary Blockade Protects the Lower Respiratory Tract of Mice from Lethal  
887 Influenza Virus Infection. *J Virol* *91*. 10.1128/jvi.00624-17.
- 888 15. Klinkhammer, J., Schnepf, D., Ye, L., Schwaderlapp, M., Gad, H.H., Hartmann, R., Garcin,  
889 D., Mahlaköiv, T., and Staeheli, P. (2018). IFN- $\lambda$  prevents influenza virus spread from the  
890 upper airways to the lungs and limits virus transmission. *Elife* *7*, 1–18.  
891 10.7554/eLife.33354.



- 892 16. Ramos-Benitez, M.J., Strich, J.R., Alehashemi, S., Stein, S., Rastegar, A., de Jesus, A.A.,  
893 Bhuyan, F., Ramelli, S., Babyak, A., Perez-Valencia, L., et al. (2022). Antiviral innate  
894 immunity is diminished in the upper respiratory tract of severe COVID-19 patients.  
895 Preprint, 10.1101/2022.11.08.22281846 10.1101/2022.11.08.22281846.
- 896 17. Gajate-Arenas, M., García-Pérez, O., Chao-Pellicer, J., Domínguez-De-Barros, A., Dorta-  
897 Guerra, R., Lorenzo-Morales, J., and Córdoba-Lanus, E. (2023). Differential expression of  
898 antiviral and immune-related genes in individuals with COVID-19 asymptomatic or with  
899 mild symptoms. *Front Cell Infect Microbiol* 13. 10.3389/fcimb.2023.1173213.
- 900 18. Ziegler, C.G.K., Miao, V.N., Owings, A.H., Navia, A.W., Tang, Y., Bromley, J.D., Lotfy, P.,  
901 Sloan, M., Laird, H., Williams, H.B., et al. (2021). Impaired local intrinsic immunity to  
902 SARS-CoV-2 infection in severe COVID-19. *Cell* 184, 4713-4733.e22.  
903 10.1016/j.cell.2021.07.023.
- 904 19. Sohn, S.Y., Hearing, J., Mugavero, J.A., Kirillov, V., Gorbunova, E., Helminiak, L., Mishra, S.,  
905 Mackow, E., Hearing, P., Reich, N.C., et al. (2021). Interferon-Lambda Intranasal Protection  
906 and Differential Sex Pathology in a Murine Model of SARS-CoV-2 Infection. *mBio* 12.  
907 10.1128/mBio.02756-21.
- 908 20. Chong, Z., Karl, C.E., Halfmann, P.J., Kawaoka, Y., Winkler, E.S., Keeler, S.P., Holtzman, M.J.,  
909 Yu, J., and Diamond, M.S. (2022). Nasally delivered interferon- $\lambda$  protects mice against  
910 infection by SARS-CoV-2 variants including Omicron. *Cell Rep* 39.  
911 10.1016/j.celrep.2022.110799.
- 912 21. Jacobs, S.E., Lamson, D.M., Kirsten, S., and Walsh, T.J. (2013). Human rhinoviruses. *Clin*  
913 *Microbiol Rev* 26. 10.1128/CMR.00077-12.
- 914 22. Liu, D.X., Liang, J.Q., and Fung, T.S. (2020). Human Coronavirus-229E, -OC43, -NL63, and -  
915 HKU1 (Coronaviridae). In *Encyclopedia of Virology: Volume 1-5, Fourth Edition*  
916 10.1016/B978-0-12-809633-8.21501-X.
- 917 23. Kowalski, M.L., Olszewska-Ziober, A., Pawelczyk, M., Piechota-Polanczyk, A., Moskwa, S.,  
918 Jarzebska, M., Jablonska, A., and Globinska, A. (2015). Rhinovirus-Induced Immune  
919 Response in Nasal Epithelial Cells. *Journal of Allergy and Clinical Immunology* 135.  
920 10.1016/j.jaci.2014.12.1427.
- 921 24. Tan, K. Sen, Ong, H.H., Yan, Y., Liu, J., Li, C., Ong, Y.K., Thong, K.T., Choi, H.W., Wang, D.Y.,  
922 and Chow, V.T. (2018). In Vitro Model of Fully Differentiated Human Nasal Epithelial Cells  
923 Infected with Rhinovirus Reveals Epithelium-Initiated Immune Responses. *Journal of*  
924 *Infectious Diseases* 217. 10.1093/infdis/jix640.
- 925 25. Ravi, A., Chang, M., van de Pol, M., Yang, S., Aliprantis, A., Thornton, B., Carayannopoulos,  
926 L.N., Bautmans, A., Robberechts, M., De Lepeleire, I., et al. (2019). Rhinovirus-16 induced  
927 temporal interferon responses in nasal epithelium links with viral clearance and  
928 symptoms. *Clinical and Experimental Allergy* 49. 10.1111/cea.13481.
- 929 26. MERS-CoV Worldwide Overview (2022). European Centre for Disease Prevention and  
930 Control.
- 931 27. MERS Situation Update (2022). World Health Organization Regional Office for the Eastern  
932 Mediterranean. <http://www.emro.who.int/health-topics/mers-cov/mers-outbreaks.html>.
- 933 28. Comar, C., Goldstein, S., Li, Y., Yount, B., Baric, R., and Weiss, S. (2019). Antagonism of  
934 dsRNA-Induced Innate Immune Pathways by NS4a and NS4b Accessory Proteins during  
935 MERS Coronavirus Infection. *mBio* 10, 1–16.

- 936 29. Comar, C.E., Otter, C.J., Pfannenstiel, J., Doerger, E., Renner, D.M., Tan, L.H., Perlman, S.,  
937 Cohen, N.A., Fehr, A.R., and Weiss, S.R. (2022). MERS-CoV endoribonuclease and  
938 accessory proteins jointly evade host innate immunity during infection of lung and nasal  
939 epithelial cells. *Proceedings of the National Academy of Sciences* *119*, 1–12.  
940 [10.1073/pnas.2123208119](https://doi.org/10.1073/pnas.2123208119).
- 941 30. Yuen, C.-K., Lam, J.-Y., Wong, W.-M., Mak, L.-F., Wang, X., Chu, H., Cai, J.-P., Jin, D.-Y., To,  
942 K.K.-W., Chan, J.F.-W., et al. (2020). SARS-CoV-2 nsp13, nsp14, nsp15 and orf6 function as  
943 potent interferon antagonists. *Emerg Microbes Infect* *9*, 1418–1428.  
944 [10.1080/22221751.2020.1780953](https://doi.org/10.1080/22221751.2020.1780953).
- 945 31. Kehrer, T., Cupic, A., Ye, C., Yildiz, S., Bouhaddou, M., Crossland, N.A., Barrall, E.A., Cohen,  
946 P., Tseng, A., Çağatay, T., et al. (2023). Impact of SARS-CoV-2 ORF6 and its variant  
947 polymorphisms on host responses and viral pathogenesis. *Cell Host Microbe* *31*, 1668-  
948 1684.e12. [10.1016/j.chom.2023.08.003](https://doi.org/10.1016/j.chom.2023.08.003).
- 949 32. Redondo, N., Zaldívar-López, S., Garrido, J.J., and Montoya, M. (2021). SARS-CoV-2  
950 Accessory Proteins in Viral Pathogenesis: Knowns and Unknowns. *Front Immunol* *12*.  
951 [10.3389/fimmu.2021.708264](https://doi.org/10.3389/fimmu.2021.708264).
- 952 33. Silvas, J.A., Vasquez, D.M., Park, J.-G., Chiem, K., Allué-Guardia, A., Garcia-Vilanova, A.,  
953 Platt, R.N., Miorin, L., Kehrer, T., Cupic, A., et al. (2021). Contribution of SARS-CoV-2  
954 Accessory Proteins to Viral Pathogenicity in K18 Human ACE2 Transgenic Mice. *J Virol* *95*.  
955 [10.1128/jvi.00402-21](https://doi.org/10.1128/jvi.00402-21).
- 956 34. Stölting, H., Baillon, L., Frise, R., Bonner, K., Hewitt, R.J., Molyneaux, P.L., Gore, M.L.,  
957 Turner, S., Custovic, A., Ghazal, P., et al. (2022). Distinct airway epithelial immune  
958 responses after infection with SARS-CoV-2 compared to H1N1. *Mucosal Immunol* *15*.  
959 [10.1038/s41385-022-00545-4](https://doi.org/10.1038/s41385-022-00545-4).
- 960 35. Cheemarla, N.R., Watkins, T.A., Mihaylova, V.T., and Foxman, E.F. (2023). Viral interference  
961 during influenza A-SARS-CoV-2 coinfection of the human airway epithelium and reversal  
962 by oseltamivir. *J Infect Dis.* [10.1093/infdis/jiad402](https://doi.org/10.1093/infdis/jiad402).
- 963 36. Javanian, M., Barary, M., Ghebrehewet, S., Koppolu, V., Vasigala, V.K.R., and Ebrahimpour,  
964 S. (2021). A brief review of influenza virus infection. Preprint, [10.1002/jmv.26990](https://doi.org/10.1002/jmv.26990)  
965 [10.1002/jmv.26990](https://doi.org/10.1002/jmv.26990).
- 966 37. Hatton, C.F., Botting, R.A., Dueñas, M.E., Haq, I.J., Verdon, B., Thompson, B.J., Spegarova,  
967 J.S., Gothe, F., Stephenson, E., Gardner, A.I., et al. (2021). Delayed induction of type I and  
968 III interferons mediates nasal epithelial cell permissiveness to SARS-CoV-2. *Nat Commun*  
969 *12*. [10.1038/s41467-021-27318-0](https://doi.org/10.1038/s41467-021-27318-0).
- 970 38. Lindemann, J., Leiacker, R., Rettinger, G., Keck, T., and Lindemann, J. (2002). Nasal  
971 mucosal temperature during respiration.
- 972 39. Keck, T., Leiacker, R., Riechelmann, H., and Rettinger, G. (2000). Temperature profile in the  
973 nasal cavity. *Laryngoscope* *110*, 651–654. [10.1097/00005537-200004000-00021](https://doi.org/10.1097/00005537-200004000-00021).
- 974 40. Otter, C.J., Fausto, A., Tan, L.H., Khosla, A.S., Cohen, N.A., and Weiss, S.R. (2023). Infection  
975 of primary nasal epithelial cells differentiates among lethal and seasonal human  
976 coronaviruses. *Proceedings of the National Academy of Sciences* *120*, e2218083120.  
977 [doi:10.1073/pnas.2218083120](https://doi.org/10.1073/pnas.2218083120).
- 978 41. Foxman, E.F., Storer, J.A., Fitzgerald, M.E., Wasik, B.R., Hou, L., Zhao, H., Turner, P.E., Pyle,  
979 A.M., and Iwasaki, A. (2015). Temperature-dependent innate defense against the

- 980 common cold virus limits viral replication at warm temperature in mouse airway cells.  
981 Proc Natl Acad Sci U S A *112*, 827–832. 10.1073/pnas.1411030112.
- 982 42. Foxman, E.F., Storer, J.A., Vanaja, K., Levchenko, A., and Iwasaki, A. (2016). Two  
983 interferon-independent double-stranded RNA-induced host defense strategies suppress  
984 the common cold virus at warm temperature. Proc Natl Acad Sci U S A *113*.  
985 10.1073/pnas.1601942113.
- 986 43. V'kovski, P., Gultom, M., Kelly, J.N., Steiner, S., Russeil, J., Mangeat, B., Cora, E., Pezoldt, J.,  
987 Holwerda, M., Kratzel, A., et al. (2021). Disparate temperature-dependent virus–host  
988 dynamics for SARS-CoV-2 and SARS-CoV in the human respiratory epithelium. PLoS Biol  
989 *19*. 10.1371/journal.pbio.3001158.
- 990 44. Li, Y., Renner, D.M., Comar, C.E., Whelan, J.N., Reyes, H.M., Cohen, N.A., and Weiss, S.R.  
991 (2021). SARS-CoV-2 induces double-stranded RNA-mediated innate immune responses in  
992 respiratory epithelial-derived cells and cardiomyocytes. PNAS *118*, 1–11.  
993 10.1073/pnas.2022643118/-/DCSupplemental.Published.
- 994 45. Love, M.I., Huber, W., and Anders, S. (2014). Moderated estimation of fold change and  
995 dispersion for RNA-seq data with DESeq2. Genome Biol *15*. 10.1186/s13059-014-0550-8.
- 996 46. Subramanian, A., Tamayo, P., Mootha, V.K., Mukherjee, S., Ebert, B.L., Gillette, M.A.,  
997 Paulovich, A., Pomeroy, S.L., Golub, T.R., Lander, E.S., et al. (2005). Gene set enrichment  
998 analysis: A knowledge-based approach for interpreting genome-wide expression profiles.  
999 Proc Natl Acad Sci U S A *102*. 10.1073/pnas.0506580102.
- 1000 47. Liberzon, A., Birger, C., Thorvaldsdóttir, H., Ghandi, M., Mesirov, J.P., and Tamayo, P.  
1001 (2015). The Molecular Signatures Database Hallmark Gene Set Collection. Cell Syst *1*.  
1002 10.1016/j.cels.2015.12.004.
- 1003 48. Mesa, R.A., Yasothan, U., and Kirkpatrick, P. (2012). Ruxolitinib. Nat Rev Drug Discov *11*,  
1004 103–104. 10.1038/nrd3652.
- 1005 49. Kim, K.A., Jung, J.H., Kang, I.G., Choi, Y.S., and Kim, S.T. (2018). ROS Is Involved in  
1006 Disruption of Tight Junctions of Human Nasal Epithelial Cells Induced by HRV16.  
1007 Laryngoscope *128*. 10.1002/lary.27510.
- 1008 50. Brand, J.D., Lazrak, A., Trombley, J.E., Shei, R.J., Adewale, A.T., Tipper, J.L., Yu, Z., Ashtekar,  
1009 A.R., Rowe, S.M., Matalon, S., et al. (2018). Influenza-mediated reduction of lung  
1010 epithelial ion channel activity leads to dysregulated pulmonary fluid homeostasis. JCI  
1011 Insight *3*. 10.1172/jci.insight.123467.
- 1012 51. Ruan, T., Sun, Y., Zhang, J., Sun, J., Liu, W., Prinz, R.A., Peng, D., Liu, X., and Xu, X. (2022).  
1013 H5N1 infection impairs the alveolar epithelial barrier through intercellular junction  
1014 proteins via Itch-mediated proteasomal degradation. Commun Biol *5*. 10.1038/s42003-  
1015 022-03131-3.
- 1016 52. Deng, X., and Baker, S.C. (2018). An “Old” protein with a new story: Coronavirus  
1017 endoribonuclease is important for evading host antiviral defenses. Virology *517*, 157–  
1018 163. 10.1016/j.virol.2017.12.024.
- 1019 53. Deng, X., Hackbart, M., Mettelman, R.C., O'Brien, A., Mielech, A.M., Yi, G., Kao, C.C., and  
1020 Baker, S.C. (2017). Coronavirus nonstructural protein 15 mediates evasion of dsRNA  
1021 sensors and limits apoptosis in macrophages. Proceedings of the National Academy of  
1022 Sciences *114*, E4251–E4260. 10.1073/pnas.1618310114.

- 1023 54. Kindler, E., Gil-Cruz, C., Spanier, J., Li, Y., Wilhelm, J., Rabouw, H.H., Züst, R., Hwang, M.,  
1024 V'kovski, P., Stalder, H., et al. (2017). Early endonuclease-mediated evasion of RNA  
1025 sensing ensures efficient coronavirus replication. *PLoS Pathog* *13*, 1–26.  
1026 [10.1371/journal.ppat.1006195](https://doi.org/10.1371/journal.ppat.1006195).
- 1027 55. Siu, K.-L., Yeung, M.L., Kok, K.-H., Yuen, K.-S., Kew, C., Lui, P.-Y., Chan, C.-P., Tse, H., Woo,  
1028 P.C.Y., Yuen, K.-Y., et al. (2014). Middle East Respiratory Syndrome Coronavirus 4a Protein  
1029 Is a Double-Stranded RNA-Binding Protein That Suppresses PACT-Induced Activation of  
1030 RIG-I and MDA5 in the Innate Antiviral Response. *J Virol* *88*, 4866–4876.  
1031 [10.1128/jvi.03649-13](https://doi.org/10.1128/jvi.03649-13).
- 1032 56. Batool, M., Shah, M., Patra, M.C., Yesudhas, D., and Choi, S. (2017). Structural insights  
1033 into the Middle East respiratory syndrome coronavirus 4a protein and its dsRNA binding  
1034 mechanism. *Sci Rep* *7*. [10.1038/s41598-017-11736-6](https://doi.org/10.1038/s41598-017-11736-6).
- 1035 57. Otter, C., Bracci, N., Parenti, N., Ye, C., Tan, L.H., Asthana, A., Pfannenstiel, J., Jackson, N.,  
1036 Fehr, A., Silverman, R., et al. (2023). SARS-CoV-2 nsp15 endoribonuclease antagonizes  
1037 dsRNA-induced antiviral signaling. *bioRxiv*.
- 1038 58. Lokugamage Kumari, G., Hage, A., de Vries, M., Valero-Jimenez Ana, M., Schindewolf, C.,  
1039 Dittmann, M., Rajsbaum, R., and Menachery Vineet, D. (2020). Type I Interferon  
1040 Susceptibility Distinguishes SARS-CoV-2 from SARS-CoV. *J Virol* *94*, [10.1128/jvi.01410-20](https://doi.org/10.1128/jvi.01410-20).  
1041 [10.1128/jvi.01410-20](https://doi.org/10.1128/jvi.01410-20).
- 1042 59. Strayer, D., Dickey, R., and Carter, W. (2014). Sensitivity of SARS/MERS CoV to Interferons  
1043 and Other Drugs Based on Achievable Serum Concentrations in Humans. *Infect Disord*  
1044 *Drug Targets* *14*. [10.2174/1871526514666140713152858](https://doi.org/10.2174/1871526514666140713152858).
- 1045 60. Okabayashi, T., Kojima, T., Masaki, T., Yokota, S. ichi, Imaizumi, T., Tsutsumi, H., Himi, T.,  
1046 Fujii, N., and Sawada, N. (2011). Type-III interferon, not type-I, is the predominant  
1047 interferon induced by respiratory viruses in nasal epithelial cells. *Virus Res* *160*.  
1048 [10.1016/j.virusres.2011.07.011](https://doi.org/10.1016/j.virusres.2011.07.011).
- 1049 61. Hermant, P., and Michiels, T. (2014). Interferon-λ in the context of viral infections:  
1050 Production, response and therapeutic implications. Preprint, [10.1159/000360084](https://doi.org/10.1159/000360084)  
1051 [10.1159/000360084](https://doi.org/10.1159/000360084).
- 1052 62. Hui, K.P.Y., Ho, J.C.W., Cheung, M. chun, Ng, K. chun, Ching, R.H.H., Lai, K. ling, Kam, T.T.,  
1053 Gu, H., Sit, K.Y., Hsin, M.K.Y., et al. (2022). SARS-CoV-2 Omicron variant replication in  
1054 human bronchus and lung ex vivo. *Nature* *603*. [10.1038/s41586-022-04479-6](https://doi.org/10.1038/s41586-022-04479-6).
- 1055 63. Shuai, H., Chan, J.F.W., Hu, B., Chai, Y., Yoon, C., Liu, H., Liu, Y., Shi, J., Zhu, T., Hu, J.C., et al.  
1056 (2023). The viral fitness and intrinsic pathogenicity of dominant SARS-CoV-2 Omicron  
1057 sublineages BA.1, BA.2, and BA.5. *EBioMedicine* *95*. [10.1016/j.ebiom.2023.104753](https://doi.org/10.1016/j.ebiom.2023.104753).
- 1058 64. Peacock, T.P., Brown, J.C., Zhou, J., Thakur, N., Newman, J., Kugathasan, R., Sukhova, K.,  
1059 Kaforou, M., Bailey, D., and Barclay, W.S. (2022). The SARS-CoV-2 variant, Omicron, shows  
1060 rapid replication in human primary nasal epithelial cultures and efficiently uses the  
1061 endosomal route of entry. *bioRxiv*.
- 1062 65. Tanneti, N., Patel, A., Tan, L.H., Marques, A., Bushman, F., Cohen, N., and Weiss, S. (2023).  
1063 Comparison of SARS-CoV-2 variants in primary human nasal cultures indicates Delta as  
1064 most cytopathic and Omicron as fastest replicating. *bioRxiv*.
- 1065 66. Asgari, S., Schlapbach, L.J., Anchisi, S., Hammer, C., Bartha, I., Junier, T., Mottet-Osman,  
1066 G., Posfay-Barbe, K.M., Longchamp, D., Stocker, M., et al. (2017). Severe viral respiratory

- 1067 infections in children with IFIH1 loss-of-function mutations. *Proc Natl Acad Sci U S A* *114*.  
1068 10.1073/pnas.1704259114.
- 1069 67. Becker, T.M., Durrani, S.R., Rajamanickam, V., Bochkov, Y.A., and Jackson, D.J. (2012).  
1070 Exogenous Interferons Reduce Rhinovirus Replication in Human Bronchial Epithelial Cells.  
1071 *Journal of Allergy and Clinical Immunology* *129*. 10.1016/j.jaci.2011.12.701.
- 1072 68. Adney, D.R., van Doremalen, N., Brown, V.R., Bushmaker, T., Scott, D., de Wit, E., Bowen,  
1073 R.A., and Munster, V.J. (2014). Replication and shedding of MERS-CoV in upper  
1074 respiratory tract of inoculated dromedary camels. *Emerg Infect Dis* *20*.  
1075 10.3201/eid2012.141280.
- 1076 69. Khalafalla, A.I., Lu, X., Al-Mubarak, A.I.A., Dalab, A.H.S., Al-Busadah, K.A.S., and Erdman,  
1077 D.D. (2015). MERS-CoV in upper respiratory tract and lungs of dromedary camels, Saudi  
1078 Arabia, 2013–2014. *Emerg Infect Dis* *21*. 10.3201/eid2107.150070.
- 1079 70. Widagdo, W., Raj, V.S., Schipper, D., Koliijn, K., van Leenders, G.J.L.H., Bosch, B.J., Bensaid,  
1080 A., Segalés, J., Baumgärtner, W., Osterhaus, A.D.M.E., et al. (2016). Differential Expression  
1081 of the Middle East Respiratory Syndrome Coronavirus Receptor in the Upper Respiratory  
1082 Tracts of Humans and Dromedary Camels. *J Virol* *90*. 10.1128/jvi.02994-15.
- 1083 71. Raj, V.S., Mou, H., Smits, S.L., Dekkers, D.H.W., Müller, M.A., Dijkman, R., Muth, D.,  
1084 Demmers, J.A.A., Zaki, A., Fouchier, R.A.M., et al. (2013). Dipeptidyl peptidase 4 is a  
1085 functional receptor for the emerging human coronavirus-EMC. *Nature* *495*, 251–254.  
1086 10.1038/nature12005.
- 1087 72. Channappanavar, R., Fehr, A., Zheng, J., Abrahante, J., Mack, M., Meyerholz, D., and  
1088 Perlman, S. (2019). Relative timing of type I interferon response and virus replication  
1089 determines disease outcome during respiratory virus infection. *The Journal of*  
1090 *Immunology* *202*. 10.4049/jimmunol.202.supp.198.4.
- 1091 73. Channappanavar, R., Fehr, A.R., Zheng, J., Wohlford-Lenane, C., Abrahante, J.E., Mack, M.,  
1092 Sompallae, R., McCray, P.B., Meyerholz, D.K., and Perlman, S. (2019). IFN-I response  
1093 timing relative to virus replication determines MERS coronavirus infection outcomes.  
1094 *Journal of Clinical Investigation* *129*. 10.1172/JCI126363.
- 1095 74. Zandi, M., Shafaati, M., Kalantar-Neyestanaki, D., Pourghadamyari, H., Fani, M., Soltani,  
1096 S., Kaleji, H., and Abbasi, S. (2022). The role of SARS-CoV-2 accessory proteins in immune  
1097 evasion. Preprint, 10.1016/j.biopha.2022.113889 10.1016/j.biopha.2022.113889.
- 1098 75. Miorin, L., Kehrer, T., Sanchez-Aparicio, M.T., Zhang, K., Cohen, P., Patel, R.S., Cupic, A.,  
1099 Makio, T., Mei, M., Moreno, E., et al. (2020). SARS-CoV-2 Orf6 hijacks Nup98 to block STAT  
1100 nuclear import and antagonize interferon signaling. *Proceedings of the National Academy*  
1101 *of Sciences* *117*, 28344–28354. 10.1073/pnas.2016650117.
- 1102 76. Zhang, Y., Chen, Y., Li, Y., Huang, F., Luo, B., Yuan, Y., Xia, B., Ma, X., Yang, T., Yu, F., et al.  
1103 (2021). The ORF8 protein of SARS-CoV-2 mediates immune evasion through down-  
1104 regulating MHC-I. *Proc Natl Acad Sci U S A* *118*. 10.1073/pnas.2024202118.
- 1105 77. Rashid, F., Xie, Z., Suleman, M., Shah, A., Khan, S., and Luo, S. (2022). Roles and functions  
1106 of SARS-CoV-2 proteins in host immune evasion. Preprint, 10.3389/fimmu.2022.940756  
1107 10.3389/fimmu.2022.940756.
- 1108 78. Thorne, L.G., Bouhaddou, M., Reuschl, A.K., Zuliani-Alvarez, L., Polacco, B., Pelin, A.,  
1109 Batra, J., Whelan, M.V.X., Hosmillo, M., Fossati, A., et al. (2022). Evolution of enhanced  
1110 innate immune evasion by SARS-CoV-2. *Nature* *602*. 10.1038/s41586-021-04352-y.

- 1111 79. Los, B., Preußner, M., Eschke, K., Vidal, R.M., Abdelgawad, A., Olofsson, D., Keiper, S.,  
1112 Paulo-Pedro, M., Grindel, A., Meinke, S., et al. (2022). Body temperature variation  
1113 controls pre-mRNA processing and transcription of antiviral genes and SARS-CoV-2  
1114 replication. *Nucleic Acids Res* 50. 10.1093/nar/gkac513.
- 1115 80. Dalton, R.M., Mullin, A.E., Amorim, M.J., Medcalf, E., Tiley, L.S., and Digard, P. (2006).  
1116 Temperature sensitive influenza a virus genome replication results from low thermal  
1117 stability of polymerase-cRNA complexes. *Virology* 3. 10.1186/1743-422X-3-58.
- 1118 81. Martínez-Sobrido, L., Peersen, O., and Nogales, A. (2018). Temperature sensitive  
1119 mutations in influenza a viral ribonucleoprotein complex responsible for the attenuation  
1120 of the live attenuated influenza vaccine. Preprint, 10.3390/v10100560  
1121 10.3390/v10100560.
- 1122 82. Hale, B.G., Randall, R.E., Ortin, J., and Jackson, D. (2008). The multifunctional NS1 protein  
1123 of influenza A viruses. *Journal of General Virology* 89, 2359–2376.  
1124 10.1099/vir.0.2008/004606-0.
- 1125 83. Kochs, G., García-Sastre, A., and Martínez-Sobrido, L. (2007). Multiple Anti-Interferon  
1126 Actions of the Influenza A Virus NS1 Protein. *J Virol* 81, 7011–7021. 10.1128/jvi.02581-06.
- 1127 84. Hatada, E., and Fukuda, R. (1992). Binding of influenza a virus NS1 protein to dsRNA in  
1128 vitro. *Journal of General Virology* 73. 10.1099/0022-1317-73-12-3325.
- 1129 85. García-Sastre, A., Egorov, A., Matassov, D., Brandt, S., Levy, D.E., Durbin, J.E., Palese, P.,  
1130 and Muster, T. (1998). Influenza A virus lacking the NS1 gene replicates in interferon-  
1131 deficient systems. *Virology* 252. 10.1006/viro.1998.9508.
- 1132 86. Shuai, H., Chan, J.F.W., Hu, B., Chai, Y., Yuen, T.T.T., Yin, F., Huang, X., Yoon, C., Hu, J.C., Liu,  
1133 H., et al. (2022). Attenuated replication and pathogenicity of SARS-CoV-2 B.1.1.529  
1134 Omicron. *Nature* 603. 10.1038/s41586-022-04442-5.
- 1135 87. Rayhane, N., Annika, S., Susanne, K., Lennart, K., Maximilian, H., Sabrina, N., Giorgio, F.,  
1136 Fabian, Z., Alexander, G., Stefan, K., et al. (2023). Reduced replication but increased  
1137 interferon resistance of SARS-CoV-2 Omicron BA.1. *Life Sci Alliance* 6, e202201745.  
1138 10.26508/lisa.202201745.
- 1139 88. Laine, L., Skön, M., Väisänen, E., Julkunen, I., and Österlund, P. (2022). SARS-CoV-2  
1140 variants Alpha, Beta, Delta and Omicron show a slower host cell interferon response  
1141 compared to an early pandemic variant. *Front Immunol* 13.  
1142 10.3389/fimmu.2022.1016108.
- 1143 89. Metzler, M., Tharyan, R.G., Klann, K., Grikscheit, K., Bojkova, D., Cinatl, J., Tascher, G.,  
1144 Ciesek, S., and Münch, C. (2023). SARS-CoV-2 Variants Show Different Host Cell Proteome  
1145 Profiles With Delayed Immune Response Activation in Omicron-Infected Cells. *Molecular  
1146 and Cellular Proteomics* 63. 10.1016/j.mcpro.2023.100537.
- 1147 90. Bojkova, D., Widera, M., Ciesek, S., Wass, M.N., Michaelis, M., and Cinatl, J. (2022).  
1148 Reduced interferon antagonism but similar drug sensitivity in Omicron variant compared  
1149 to Delta variant of SARS-CoV-2 isolates. Preprint, 10.1038/s41422-022-00619-9  
1150 10.1038/s41422-022-00619-9.
- 1151 91. Shalamova, L., Felgenhauer, U., Wilhelm, J., Schaubmar, A.R., Büttner, K., Schoen, A.,  
1152 Widera, M., Ciesek, S., and Weber, F. (2022). Omicron variant of SARS-CoV-2 exhibits an  
1153 increased resilience to the antiviral type I interferon response. *PNAS Nexus* 1, pgac067.  
1154 10.1093/pnasnexus/pgac067.

- 1155 92. Guo, K., Barrett, B.S., Morrison, J.H., Mickens, K.L., Vldar, E.K., Hasenkrug, K.J., Poeschla,  
1156 E.M., and Santiago, M.L. (2022). Interferon resistance of emerging SARS-CoV-2 variants.  
1157 *Proceedings of the National Academy of Sciences* *119*, e2203760119.  
1158 [10.1073/pnas.2203760119](https://doi.org/10.1073/pnas.2203760119).
- 1159 93. Lee, R.J., Workman, A.D., Carey, R.M., Chen, B., Rosen, P.L., Doghramji, L., Adappa, N.D.,  
1160 Palmer, J.N., Kennedy, D.W., and Cohen, N.A. (2016). Fungal Aflatoxins Reduce Respiratory  
1161 Mucosal Ciliary Function. *Sci Rep* *6*. [10.1038/srep33221](https://doi.org/10.1038/srep33221).
- 1162 94. Lee, R.J., Hariri, B.M., McMahon, D.B., Chen, B., Doghramji, L., Adappa, N.D., Palmer, J.N.,  
1163 Kennedy, D.W., Jiang, P., Margolskee, R.F., et al. (2017). Bacterial D-amino acids suppress  
1164 sinonasal innate immunity through sweet taste receptors in solitary chemosensory cells.  
1165 *Sci Signal* *10*, 1–12. [10.1126/scisignal.aam7703](https://doi.org/10.1126/scisignal.aam7703).
- 1166 95. Otter, C.J., Fausto, A., Tan, L.H., Weiss, S.R., and Cohen, N.A. (2023). Infection of Primary  
1167 Nasal Epithelial Cells Grown at an Air-Liquid Interface to Characterize Human  
1168 Coronavirus-Host Interactions. *Journal of Visualized Experiments* *2023*. [10.3791/64868](https://doi.org/10.3791/64868).
- 1169 96. Fausto, A., Otter, C.J., Bracci, N., and Weiss, S.R. (2023). Improved Culture Methods for  
1170 Human Coronaviruses HCoV-OC43, HCoV-229E, and HCoV-NL63. *Curr Protoc* *3*.
- 1171 97. Fehr, A.R. (2020). Bacterial Artificial Chromosome-Based Lambda Red Recombination  
1172 with the I-SceI Homing Endonuclease for Genetic Alteration of MERS-CoV. In *MERS*  
1173 *Coronavirus: Methods and Protocols (Methods in Molecular Biology)*, pp. 53–68.  
1174 [10.1007/978-1-0716-0211-9](https://doi.org/10.1007/978-1-0716-0211-9).
- 1175 98. Andrews, S., Biggins, L., Inglesfield, S., Carr, H., and Montgomery, J. (2010). FastQC: a  
1176 quality control tool for high throughput.
- 1177 99. Bushnell, B. (2014). BBTools software package.
- 1178 100. Patro, R., Duggal, G., Love, M.I., Irizarry, R.A., and Kingsford, C. (2017). Salmon provides  
1179 fast and bias-aware quantification of transcript expression. *Nat Methods* *14*.  
1180 [10.1038/nmeth.4197](https://doi.org/10.1038/nmeth.4197).
- 1181 101. Blighe, K., Rna, S., and Lewis, M. (2023). EnhancedVolcano: publication-ready volcano  
1182 plots with enhanced colouring and labeling.  
1183

**Figure 1 Respiratory viruses exhibit two distinct replication phenotypes in primary nasal epithelial cells**

**A**

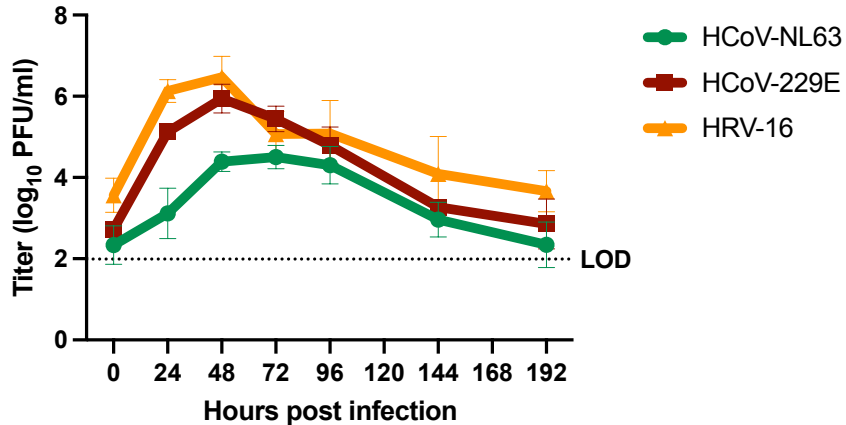

**B**

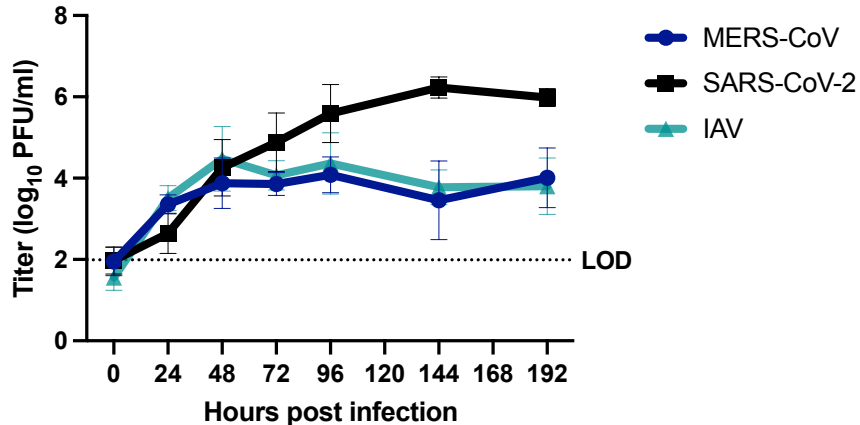



**Figure 2 Common cold-associated viruses induce robust, early IFN responses**

**A**

● genes  
● IFN Response

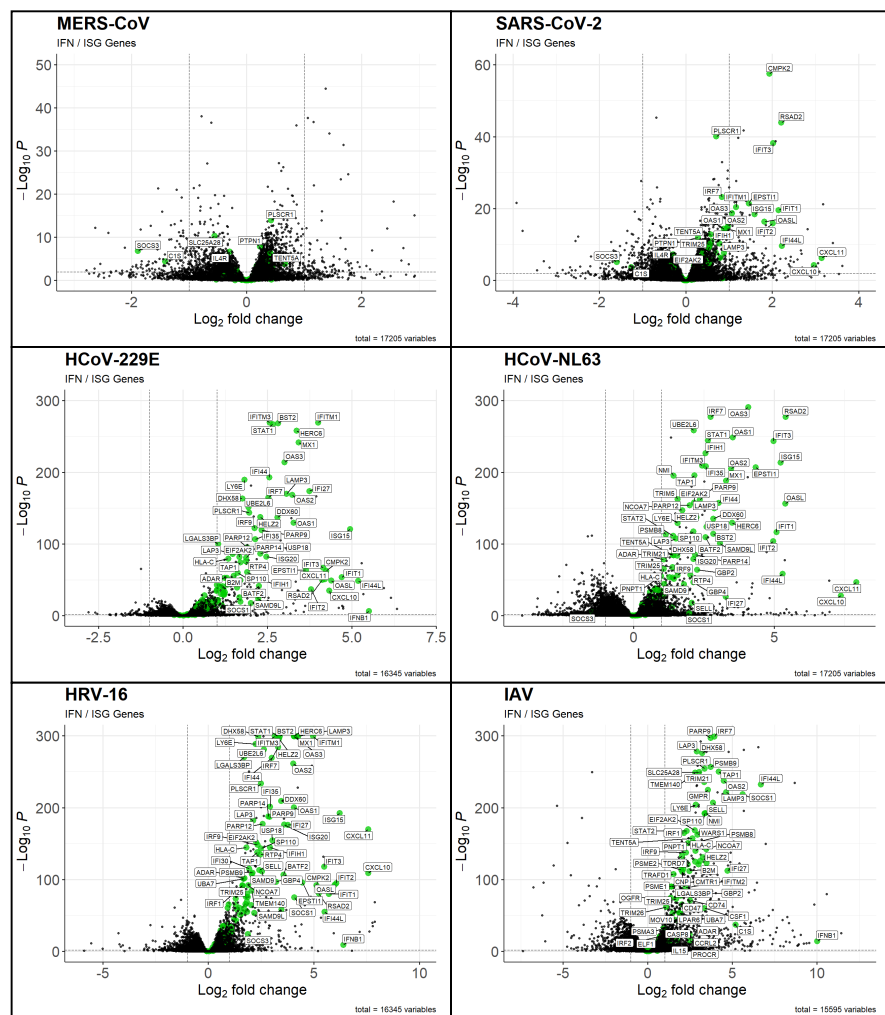

**B**

| Virus  | MERS | SARS-2 | NL63 | 229E | HRV-16 | IAV |
|--------|------|--------|------|------|--------|-----|
| # ISGs | 2    | 15     | 68   | 70   | 82     | 96  |

**D**

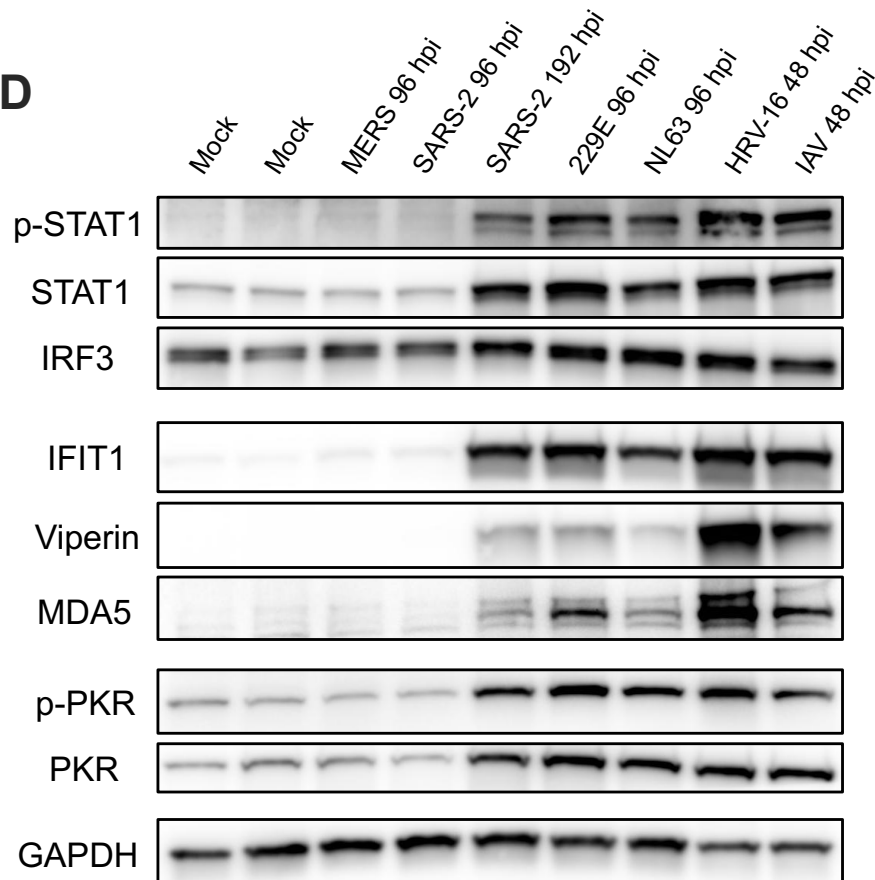

**C**

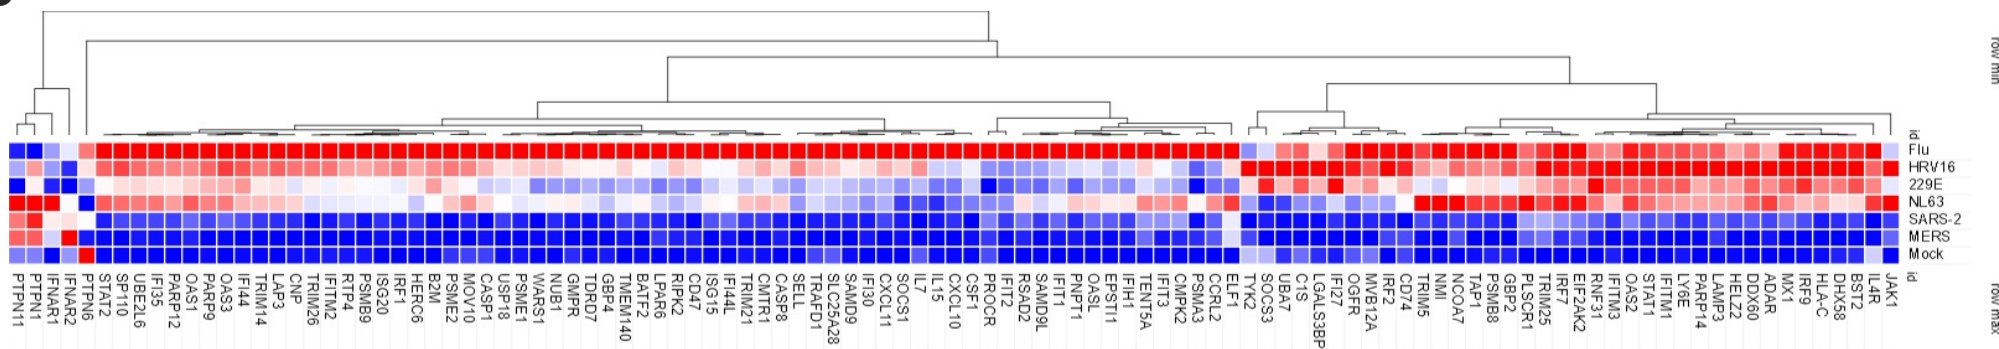

**Figure 3 Clearance of common cold-associated viruses is IFN-mediated**

**A**

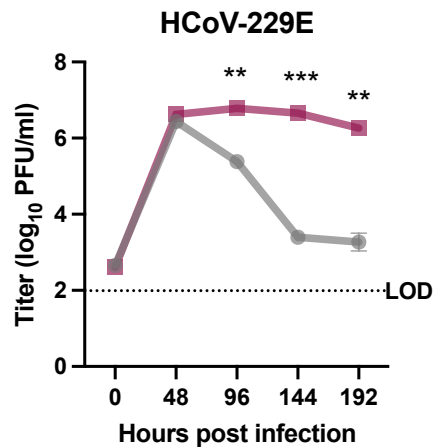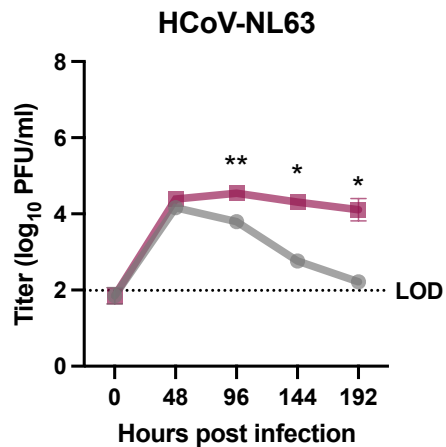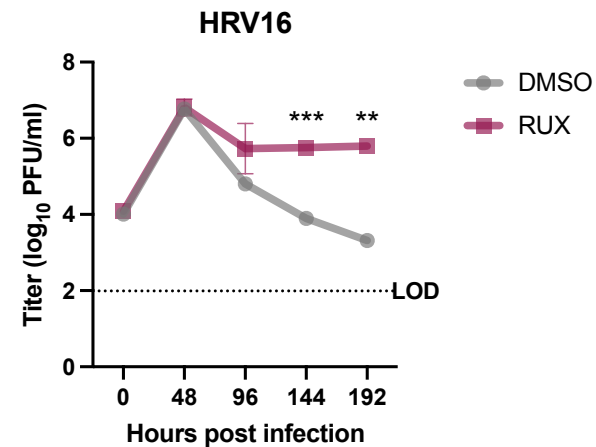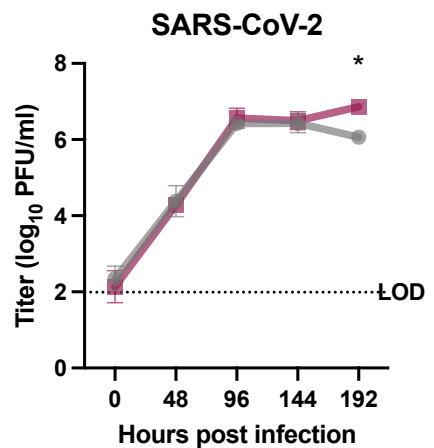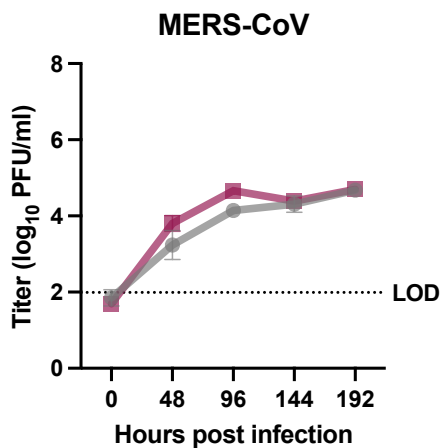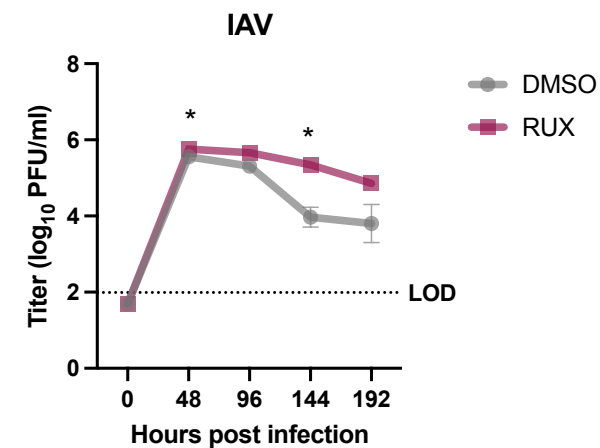

**B**

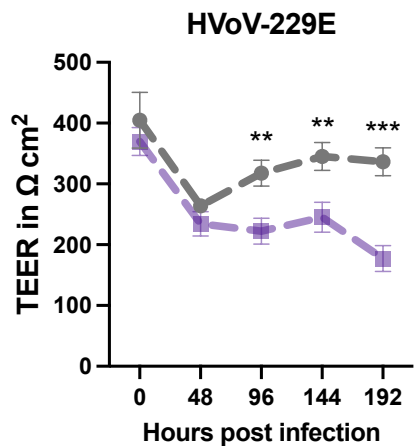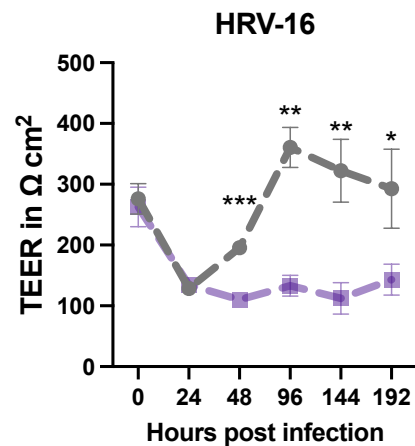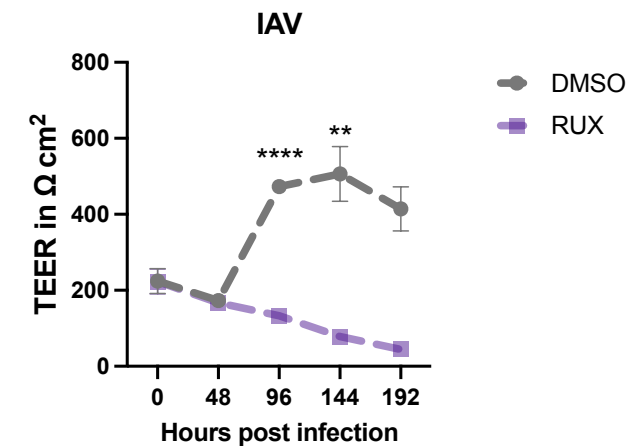

**Figure 4 Lethal HCoV-229E with inactivated IFN antagonists exhibit IFN-mediated clearance**

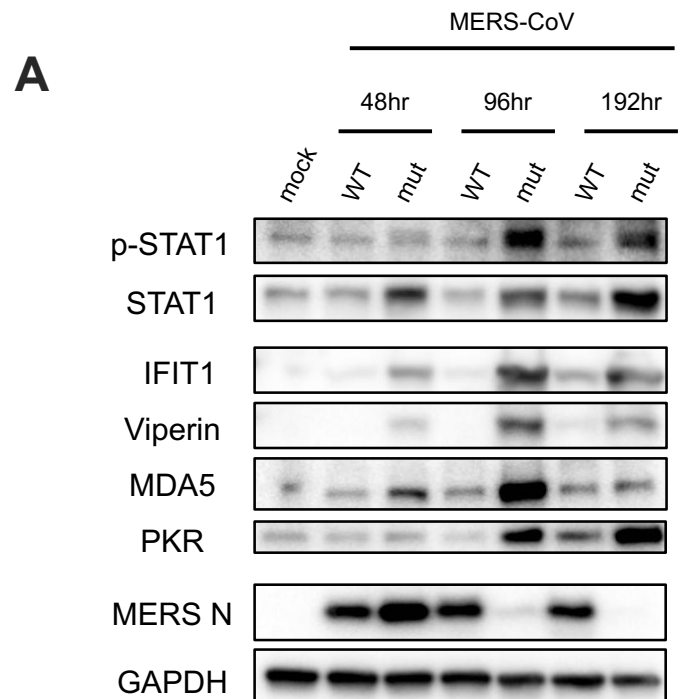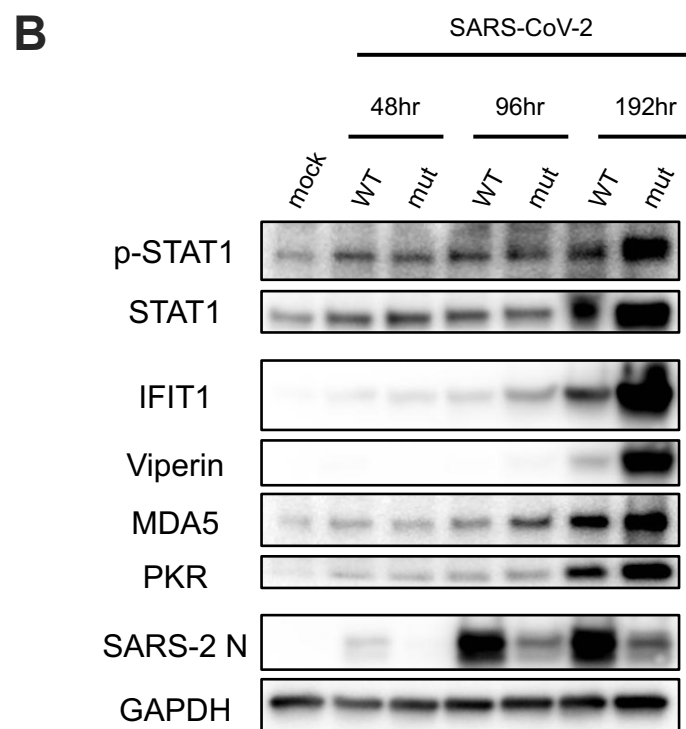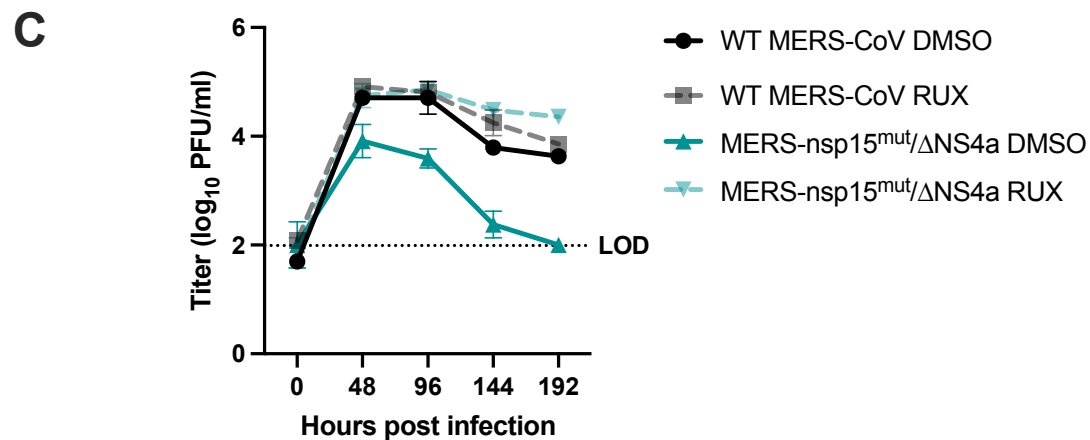

| Comparison                                                                     | 0hr | 48hr | 96hr | 144hr | 192hr |
|--------------------------------------------------------------------------------|-----|------|------|-------|-------|
| WT MERS-CoV DMSO vs. WT MERS-CoV RUX                                           | ns  | ns   | ns   | ns    | ns    |
| WT MERS-CoV DMSO vs. MERS-nsp15 <sup>mut</sup> /ΔNS4a DMSO                     | ns  | **   | ns   | ns    | ns    |
| WT MERS-CoV DMSO vs. MERS-nsp15 <sup>mut</sup> /ΔNS4a RUX                      | ns  | ns   | ns   | *     | **    |
| WT MERS-CoV RUX vs. MERS-nsp15 <sup>mut</sup> /ΔNS4a DMSO                      | ns  | **   | ns   | ns    | ns    |
| WT MERS-CoV RUX vs. MERS-nsp15 <sup>mut</sup> /ΔNS4a RUX                       | ns  | ns   | ns   | ns    | **    |
| MERS-nsp15 <sup>mut</sup> /ΔNS4a DMSO vs. MERS-nsp15 <sup>mut</sup> /ΔNS4a RUX | ns  | ns   | *    | *     | **    |

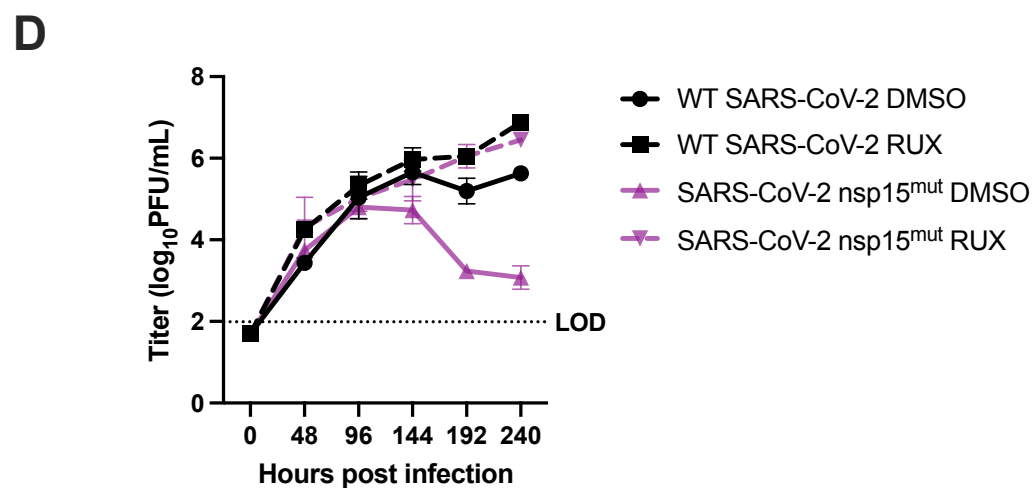

| Comparison                                                                   | 0hr | 48hr | 96hr | 144hr | 192hr | 240hr |
|------------------------------------------------------------------------------|-----|------|------|-------|-------|-------|
| WT SARS-CoV-2 DMSO vs. WT SARS-CoV-2 RUX                                     | ns  | ns   | ns   | ns    | *     | **    |
| WT SARS-CoV-2 DMSO vs. SARS-CoV-2 nsp15 <sup>mut</sup> DMSO                  | ns  | ns   | ns   | ns    | ns    | ns    |
| WT SARS-CoV-2 DMSO vs. SARS-CoV-2 nsp15 <sup>mut</sup> RUX                   | ns  | ns   | ns   | ns    | ns    | ns    |
| WT SARS-CoV-2 RUX vs. SARS-CoV-2 nsp15 <sup>mut</sup> DMSO                   | ns  | ns   | ns   | ns    | *     | *     |
| WT SARS-CoV-2 RUX vs. SARS-CoV-2 nsp15 <sup>mut</sup> RUX                    | ns  | ns   | ns   | ns    | ns    | *     |
| SARS-CoV-2 nsp15 <sup>mut</sup> DMSO vs. SARS-CoV-2 nsp15 <sup>mut</sup> RUX | ns  | ns   | ns   | ns    | ns    | ns    |

**Figure 5 Respiratory viruses are differentially sensitive to IFN pre-treatments in primary nasal epithelial cells**

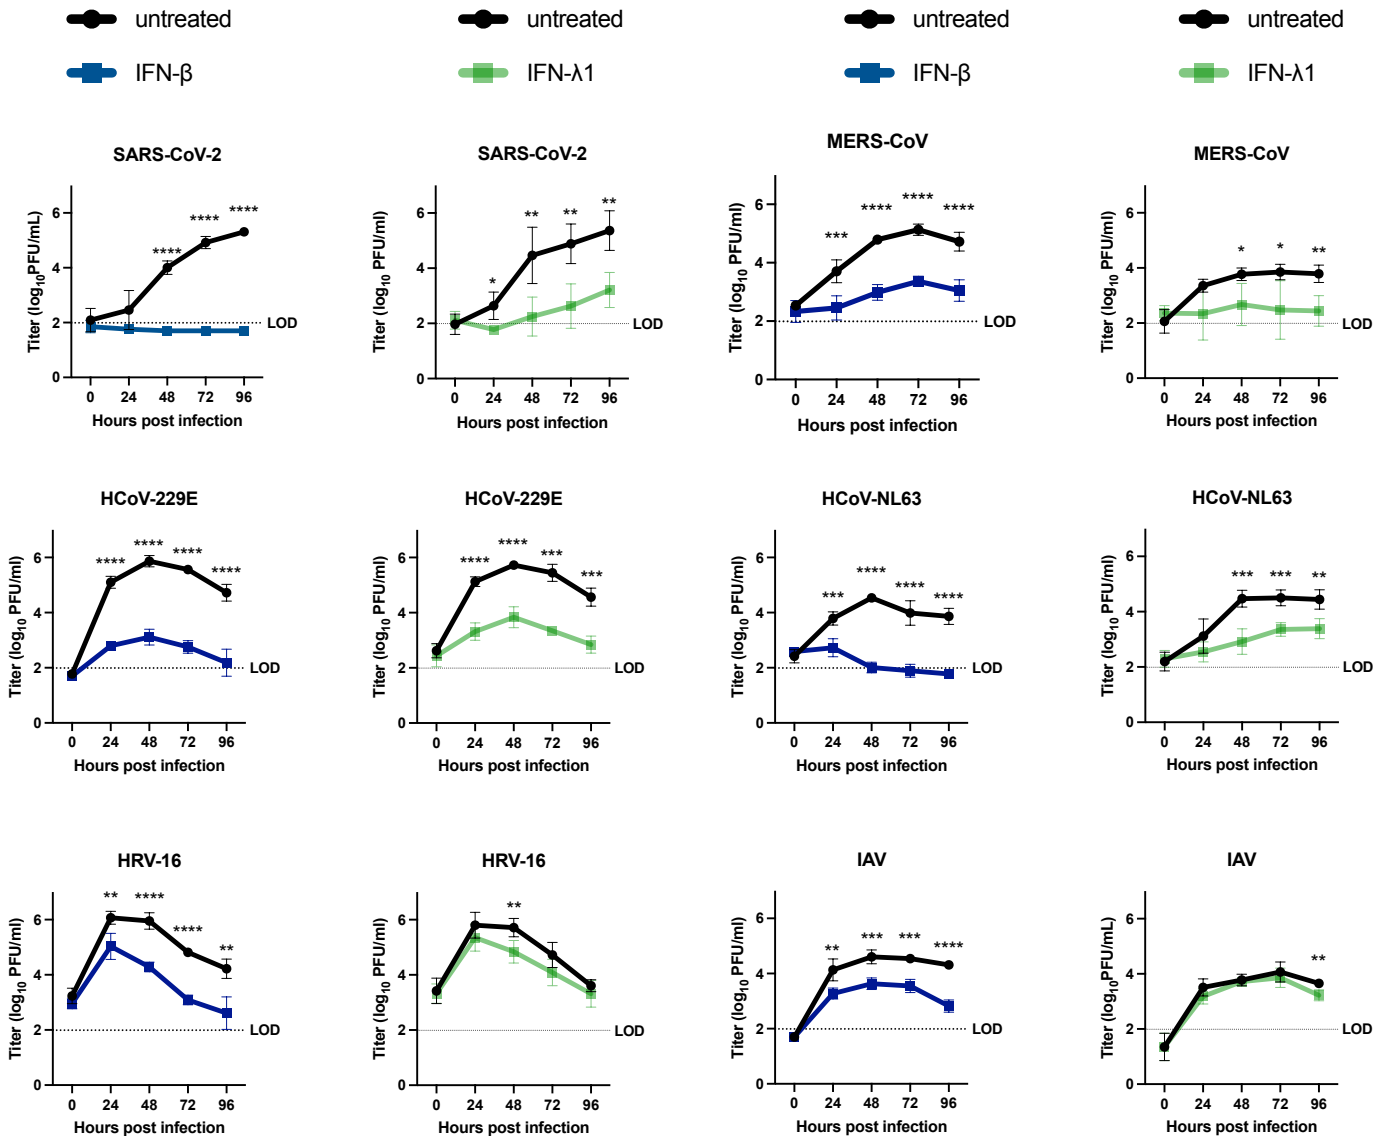

**Figure 6 Enhanced IFN responses restrict replication of common cold-associated viruses at elevated temperature**

**A**

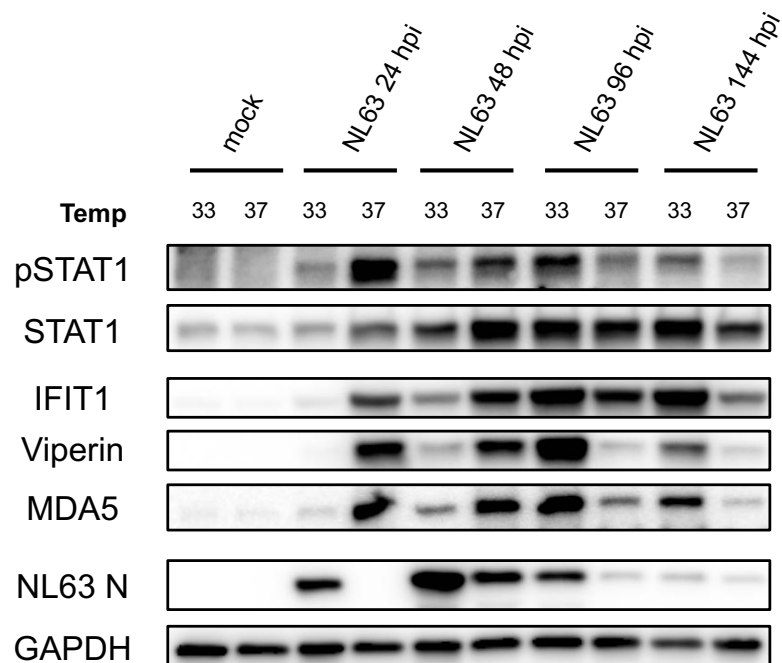

**B**

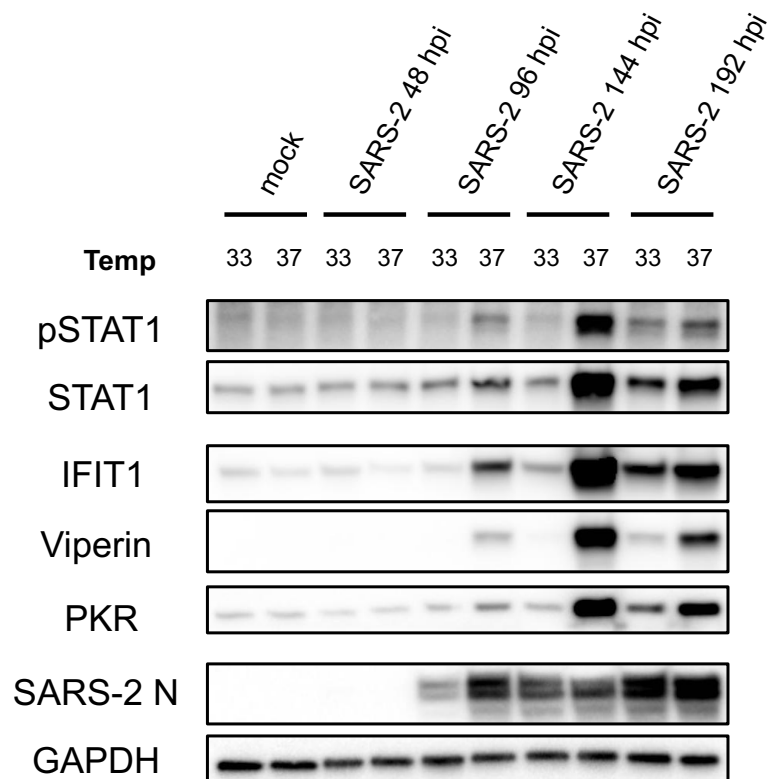

**C**

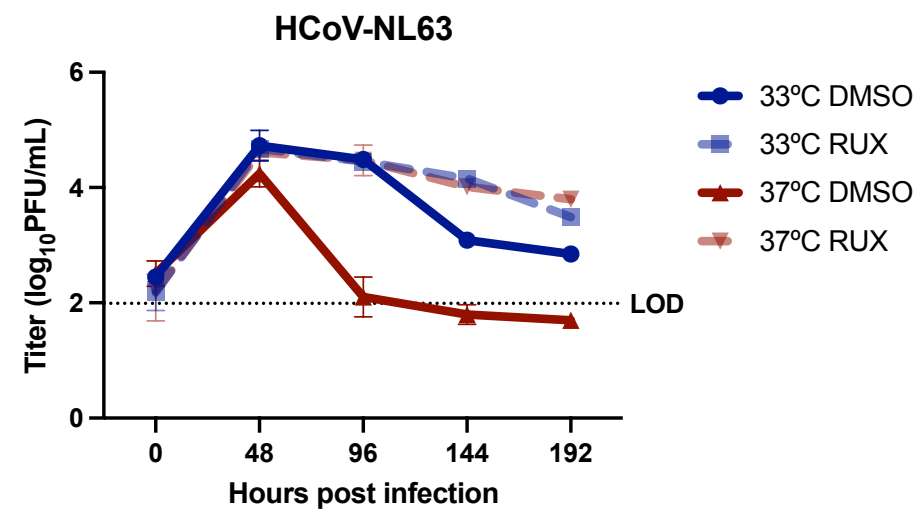

| Comparison              | 0hpi | 48hpi | 96hpi | 144hpi | 192hpi |
|-------------------------|------|-------|-------|--------|--------|
| 33°C DMSO vs. 33°C RUX  | ns   | ns    | ns    | ***    | **     |
| 33°C DMSO vs. 37°C DMSO | ns   | ns    | **    | **     | **     |
| 33°C DMSO vs. 37°C RUX  | ns   | ns    | ns    | ***    | **     |
| 33°C RUX vs. 37°C DMSO  | ns   | ns    | **    | ***    | ****   |
| 33°C RUX vs. 37°C RUX   | ns   | ns    | ns    | ns     | ns     |
| 37°C DMSO vs. 37°C RUX  | ns   | ns    | ***   | ***    | **     |

**D**

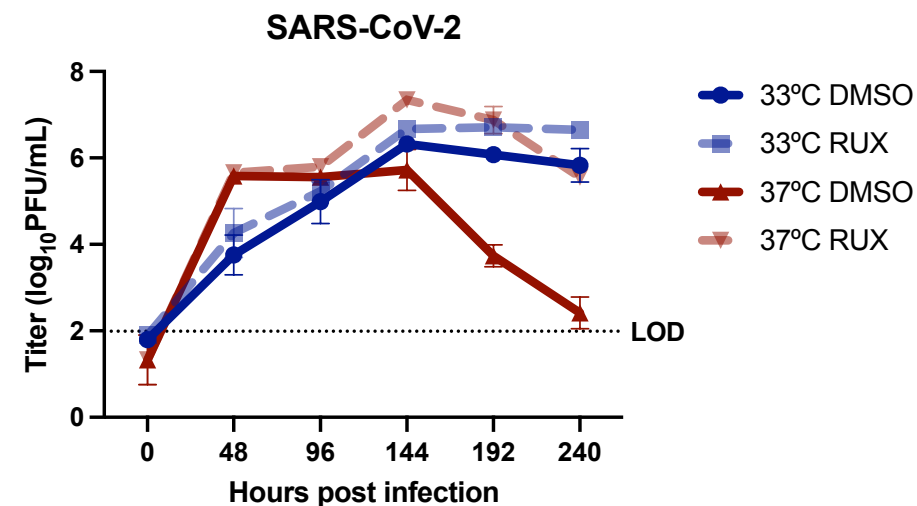

| Comparison              | 0hpi | 48hpi | 96hpi | 144hpi | 192hpi | 240hpi |
|-------------------------|------|-------|-------|--------|--------|--------|
| 33°C DMSO vs. 33°C RUX  | ns   | ns    | ns    | ns     | **     | *      |
| 33°C DMSO vs. 37°C DMSO | ns   | *     | ns    | ns     | ***    | ***    |
| 33°C DMSO vs. 37°C RUX  | ns   | *     | ns    | **     | *      | ns     |
| 33°C RUX vs. 37°C DMSO  | ns   | *     | ns    | ns     | ***    | ***    |
| 33°C RUX vs. 37°C RUX   | ns   | *     | *     | *      | ns     | **     |
| 37°C DMSO vs. 37°C RUX  | ns   | ns    | ns    | *      | ***    | **     |

**Figure 7 Omicron BA.1 exhibits a unique phenotype in primary nasal epithelial cells**

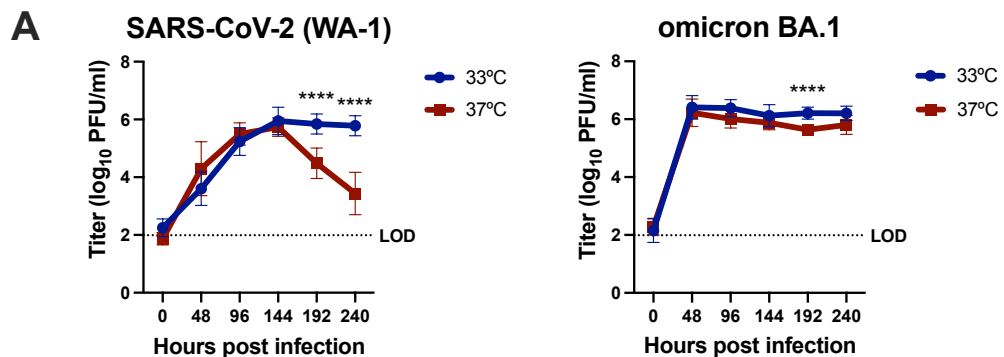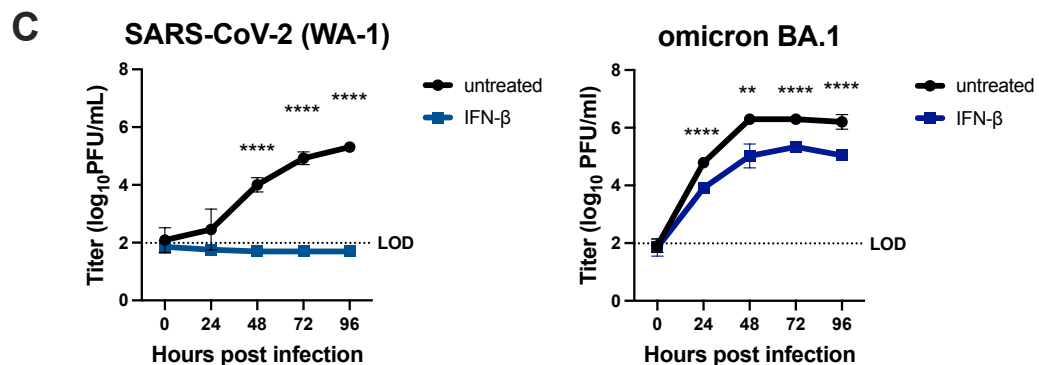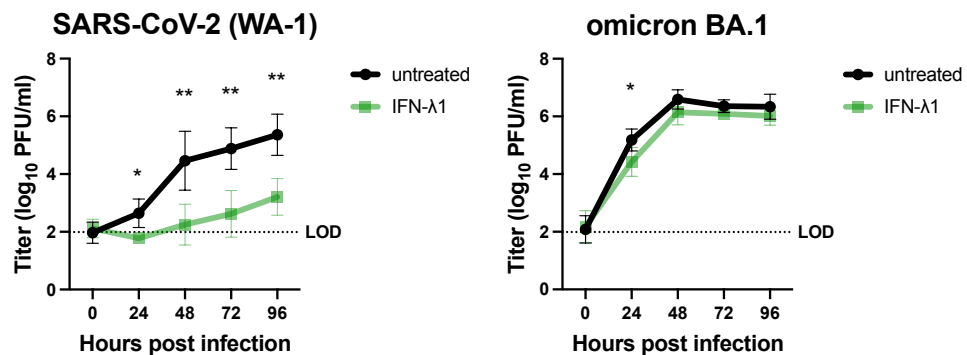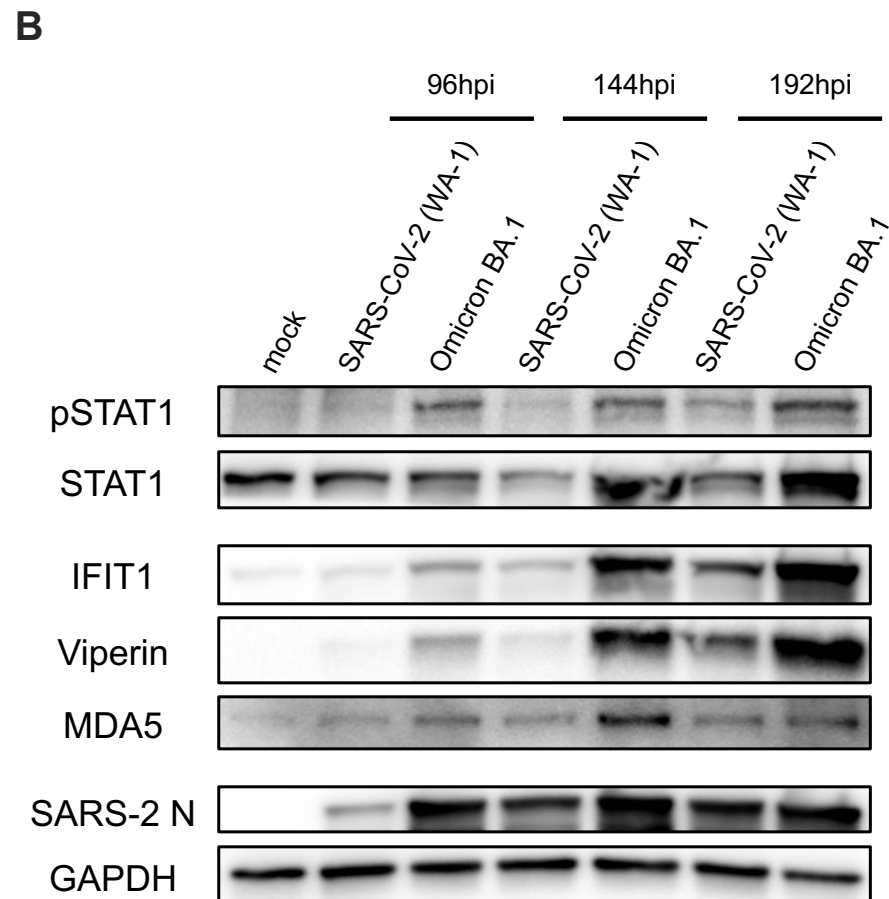

Source: https://www.biorxiv.org/content/10.1101/2023.12.18.571720v1.full.pdf
